# Supplementary material for: Achievement of recommended targets for cardiovascular disease prevention in adults with diabetes in 38 low- and middle-income countries
Source: PubMed Central journal article supplement (PMC11413614; doi:10.7189/jogh.14.04148), 2024-09-20
Supplement: jogh-14-04148-s001.pdf [file jogh-14-04148-s001.pdf]

## Online Supplementary Document

|                                                                                                                                                                                                                                 |           |
|---------------------------------------------------------------------------------------------------------------------------------------------------------------------------------------------------------------------------------|-----------|
| <b>Appendix 1: Supplemental methods</b> .....                                                                                                                                                                                   | <b>2</b>  |
| <b>Appendix 2: Survey and subpopulation characteristics</b> .....                                                                                                                                                               | <b>5</b>  |
| Supplementary Table S1: Survey characteristics .....                                                                                                                                                                            | 5         |
| Supplementary Table S2: Supplementary Table S2: Characteristics of study subpopulation with diabetes .....                                                                                                                      | 6         |
| Supplementary Table S3: Individual characteristics of the diabetes, high risk of cardiovascular disease (CVD) and established CVD group .....                                                                                   | 7         |
| <b>Appendix 3: Prevalence of treatment, metabolic and lifestyle targets for CVD prevention in patients with diabetes, by region and country</b> .....                                                                           | <b>8</b>  |
| Supplementary Table S4: Prevalence of treatment, metabolic and lifestyle targets for CVD prevention in patients with diabetes, by income group .....                                                                            | 8         |
| Supplementary Table S5: Prevalence of treatment, metabolic and lifestyle targets for CVD prevention in patients with diabetes, by region .....                                                                                  | 10        |
| Supplementary Table S6: Prevalence of treatment, metabolic and lifestyle targets for CVD prevention in patients with diabetes, by country .....                                                                                 | 11        |
| <b>Appendix 4: Prevalence of guideline-recommended targets for all treatment, metabolic and lifestyle components of CVD prevention in patients with diabetes by World Bank income group and region</b> .....                    | <b>16</b> |
| Supplementary Table S7: Prevalence of guideline-recommended targets for all treatment, metabolic and lifestyle components of CVD prevention in patients with diabetes by World Bank income group and region .....               | 16        |
| <b>Appendix 5: Association between individual characteristics and guideline-recommended treatment, metabolic and lifestyle targets in people with diabetes</b> .....                                                            | <b>17</b> |
| Supplementary Table S8: Association between individual characteristics and guideline-recommended treatment, metabolic and lifestyle targets in people with diabetes (Univariate Poisson regression model) .....                 | 17        |
| Supplementary Table S9: Association between individual characteristics and guideline-recommended treatment, metabolic and lifestyle targets in people with diabetes (Multivariable Poisson regression model).....               | 24        |
| <b>Appendix 6: Sensitivity analysis</b> .....                                                                                                                                                                                   | <b>30</b> |
| Supplementary Table S10-S12: Prevalence of treatment, metabolic and lifestyle targets to prevent CVD among people with diabetes using re-adjusted weights for the proportion of the population aged 25-69 in each country ..... | 30        |
| Supplementary Table S13-S14: Prevalence of aspirin use in WHO ISH risk >30% subgroup, by income group and region .....                                                                                                          | 33        |
| Supplementary Table S15: Prevalence of blood pressure <130/80 mm Hg, by income group and region .....                                                                                                                           | 35        |
| <b>Appendix 7: STROBE Checklist</b> .....                                                                                                                                                                                       | <b>36</b> |

## **Appendix 1: Supplemental methods**

The following content complements the methodology section in the main paper.

### **Inclusion criteria for surveys**

1. Since the STEP-wise approach to noncommunicable disease risk factor surveillance (STEPS) after 2013 introduced the question of cardiovascular disease (CVD) history, we selected the survey conducted after 2013.
2. The surveys and studies are all obtained from the STEPS database on the World Health Organization (WHO) official website and have nationally representative individual-level data.
3. Surveys were exclusively carried out in countries classified as upper-middle (UMIC), lower-middle (L-MIC), or low-income (LIC) according to the World Bank's classification for the survey year.
4. For some countries, such as Pakistan and Tonga, they were excluded from our analysis because metabolic biochemical indicators were not collected.
5. Given the specificity of pregnant women, only non-pregnant adults were included in our analysis.

### **Country classification and characteristics**

We grouped countries according to geographical regions defined by the WHO and income groups defined by the World Bank in the year the survey was conducted.

*References:* World Bank. World Bank Country and Lending Groups – World Bank Data Help Desk. 2019. <https://datahelpdesk.worldbank.org/knowledgebase/articles/906519-world-bank-country-and-lending->(accessed May 23, 2024).

### **Survey introduction**

For detailed sampling methods, survey procedures, WHO STEPS questionnaire and introductions for each country, please refer to the following websites (accessed January 3, 2023):

<https://extranet.who.int/ncdsmicrodata/index.php/catalog/steps/?page=1&ps=15&repo=STEPS>

### **Data sharing**

Data from the 38 countries surveyed in this study are shared and publicly available. After passing the application process, survey files, codebooks and de-identified microdata can be downloaded via the link above or WHO website.

### **Text of relevant questions in the underlying surveys**

1. History of diabetes mellitus  
“Have you ever been told by a doctor or other health worker that you have raised blood sugar or diabetes?”
2. Treatment targets

Hypoglycemic agents: “In the past two weeks, have you taken any drugs (medication) for diabetes prescribed by a doctor or other health worker?”

Statins: “Are you currently taking statins (Lovastatin/Simvastatin/Atorvastatin or any other statin) regularly to prevent or treat heart disease?”

Antihypertensive drugs: “In the past two weeks, have you taken any drugs (medication) for raised blood pressure prescribed by a doctor or other health worker?”

Aspirin: “Are you currently taking aspirin regularly to prevent or treat heart disease?”

### 3. Lifestyle targets

Tobacco use: “Do you currently smoke any tobacco products, such as cigarettes, cigars or pipes?”

Alcohol consumption: “Have you consumed any alcohol within the past 30 days?”

Dietary fruit and vegetable: “In a typical week, on how many days do you eat fruit?” & “How many servings of fruit do you eat on one of those days?” & “In a typical week, on how many days do you eat vegetables?” & “How many servings of vegetables do you eat on one of those days?”

Physical activity: “Does your work involve vigorous-intensity activity that causes large increases in breathing or heart rate like [carrying or lifting heavy loads, digging or construction work] for at least 10 minutes continuously?” & “In a typical week, on how many days do you do vigorous-intensity activities as part of your work?” & “How much time do you spend doing vigorous-intensity activities at work on a typical day?” & “Does your work involve moderate-intensity activity, that causes small increases in breathing or heart rate such as brisk walking [or carrying light loads] for at least 10 minutes continuously?” & “In a typical week, on how many days do you do moderate-intensity activities as part of your work?” & “How much time do you spend doing moderate-intensity activities at work on a typical day?”. Physical activities included work and recreational activities. The content of the Recreational activity questionnaire is the same as that of work.

### **Statistical analysis**

Continuous variables are presented using means and standard deviations, while categorical variables are conveyed through counts and proportions. For each country in the STEPS dataset, the proportions of CVD secondary prevention behaviors, along with 95% confidence intervals, were computed using sampling weights, stratifications, and primary sampling units provided by the 38 countries. To refine the analysis, new adjusted weights were calculated for each country by utilizing the original sampling weights in the dataset (e.g., Step 1 weights from STEP Survey 1). These adjusted weights were calculated by dividing the sum of the pooled sample weights by the sum of the original weights for each country, and then multiplying the result by the original weight for each individual. The 10-year CVD risk was estimated for each participant according to the WHO CVD risk laboratory-based charts. The WHO CVD risk laboratory-based charts including sex, age, current smoking, systolic blood pressure, diabetes mellitus, and total cholesterol. High-risk population was classified based on a 10-year CVD risk score greater than 20%.

In order to explore individualized characteristics influencing guideline compliance, we computed overall proportions and subgroups (e.g., gender, age groups: 18-34 years, 35-44 years, 45-54 years, 55-69 years. Prevalence of CVD prevention recommendations by World Bank income category, WHO region, and education group). Due to the relatively low prevalence of our indicator of interest among CVD patients within each country, Zou's modified Poisson regression with robust error variance was employed to fit the

multivariable regression model. We report regressions as the absolute difference between the risk ratio and the predicted probability and the average marginal effect. All descriptive statistics and regression models are estimated using a robust error structure with standard errors adjusted for clustering in the primary sample unit. Standard errors were computed using a linear variance estimator via Stata's command `set`. The treatment variables, metabolic variables, lifestyle variables, and covariates (such as gender and education) that were primarily analyzed had missing values of less than 0.5%. Consequently, we consider these missing data negligible, and they were not separately addressed in the statistical analyses.

The weights were re-adjusted in sensitivity analyses. These adjusted weights were derived by dividing the sum of the original weights by the 2019 population aged 25-69, and then multiplying the result by the original weights for each country. In sensitivity analyses, the 10-year CVD risk was estimated for each participant according to the 2007 WHO/ International Society of Hypertension (WHO ISH) CVD risk charts. The WHO ISH CVD risk charts including sex, age, current smoking, systolic blood pressure, diabetes mellitus, and total cholesterol. High-risk population was classified based on a 10-year CVD risk score greater than 30%.

We plotted Figures 1 to 3 using the `ggplot2` package in R version 4.2.2. Other analyzes were performed in Stata version 18.0 software, mainly using the “`svyset`” command.

## Appendix 2: Survey and subpopulation characteristics

Supplementary Table S1: Survey characteristics

| Country       | ISO code | Income group* | Year† | Response rate‡ | Sample size§ | Proportion of female participants (%) | Median age, years | With established diabetes | Proportion of individuals by country with a history of diabetes¶ |
|---------------|----------|---------------|-------|----------------|--------------|---------------------------------------|-------------------|---------------------------|------------------------------------------------------------------|
| <b>Africa</b> |          |               |       |                |              |                                       |                   |                           |                                                                  |
| Algeria       | DZA      | UMIC          | 2016  | 94             | 2308         | 54.9                                  | 42 (34-52)        | 211                       | 2.63 (2.05, 3.37)                                                |
| Benin         | BEN      | LIC           | 2015  | 99             | 3950         | 52.1                                  | 39 (31-49)        | 40                        | 2.63 (1.75, 3.93)                                                |
| Botswana      | BWA      | UMIC          | 2014  | 64             | 2252         | 69.4                                  | 39 (31-50)        | 76                        | 2.63 (1.76, 3.93)                                                |
| Cabo Verde    | CPV      | L-MIC         | 2020  | 64             | 1941         | 61.5                                  | 44 (34-55)        | 122                       | 2.63 (2.04, 3.38)                                                |
| Eswatini      | SWZ      | L-MIC         | 2014  | 76             | 1738         | 66.8                                  | 42 (32-54)        | 77                        | 2.63 (1.90, 3.64)                                                |
| Ethiopia      | ETH      | LIC           | 2015  | 96             | 6376         | 57.0                                  | 37 (30-48)        | 95                        | 2.63 (1.87, 3.70)                                                |
| Kenya         | KEN      | LIC           | 2015  | 92             | 3239         | 59.2                                  | 39 (31-50)        | 72                        | 2.63 (1.80, 3.84)                                                |
| Malawi        | MWI      | LIC           | 2017  | NR             | 2926         | 64.4                                  | 40 (32-52)        | 31                        | 2.63 (1.40, 4.90)                                                |

|                              |     |       |      |       |      |      |            |     |                   |
|------------------------------|-----|-------|------|-------|------|------|------------|-----|-------------------|
| Sao Tome and Principe        | STP | L-MIC | 2019 | 91    | 1425 | 60.4 | 39 (32-49) | 81  | 0.47 (1.86, 3.72) |
| Uganda                       | UGA | LIC   | 2014 | 99    | 2556 | 58.8 | 38 (30-48) | 36  | 2.63 (1.72, 4.00) |
| Zambia                       | ZMB | L-MIC | 2017 | 74    | 2392 | 60.6 | 40 (32-50) | 48  | 2.63 (1.81, 3.80) |
| <b>Americas</b>              |     |       |      |       |      |      |            |     |                   |
| Ecuador                      | ECU | UMIC  | 2018 | 69    | 3310 | 58.6 | 44 (34-55) | 272 | 2.63 (2.20, 3.14) |
| Guyana                       | GUY | L-MIC | 2016 | 77    | 684  | 62.4 | 45 (35-55) | 95  | 2.63 (1.99, 3.47) |
| <b>Eastern Mediterranean</b> |     |       |      |       |      |      |            |     |                   |
| Afghanistan                  | AFG | LIC   | 2018 | 78    | 2524 | 44.7 | 42 (33-53) | 226 | 2.63 (1.83, 3.76) |
| Iraq                         | IRQ | UMIC  | 2015 | 99    | 2836 | 60.7 | 42 (34-52) | 377 | 2.63 (2.22, 3.12) |
| Jordan                       | JOR | UMIC  | 2019 | 95    | 2741 | 64.5 | 43 (35-54) | 451 | 2.63 (2.26, 3.06) |
| Lebanon                      | LBN | UMIC  | 2017 | 66-74 | 958  | 63.2 | 50 (41-56) | 106 | 2.63 (1.91, 3.61) |
| Morocco                      | MAR | L-MIC | 2017 | 89    | 3692 | 65.8 | 45 (36-55) | 370 | 2.63 (2.31, 2.99) |
| Sudan                        | SDN | L-MIC | 2016 | 95    | 5228 | 63.0 | 40 (32-50) | 323 | 2.63 (2.09, 3.30) |
| <b>Europe</b>                |     |       |      |       |      |      |            |     |                   |
| Armenia                      | ARM | L-MIC | 2016 | 42    | 1368 | 73.0 | 49 (36-58) | 96  | 2.63 (1.96, 3.52) |
| Azerbaijan                   | AZE | UMIC  | 2017 | 97    | 2259 | 58.9 | 49 (37-57) | 185 | 2.63 (2.11, 3.27) |
| Belarus                      | BLR | UMIC  | 2016 | 87    | 4391 | 58.4 | 49 (39-58) | 317 | 2.63 (2.20, 3.14) |
| Georgia                      | GEO | L-MIC | 2016 | 76    | 2868 | 72.6 | 52 (41-61) | 234 | 2.63 (2.17, 3.18) |
| Kyrgyzstan                   | KGZ | LIC   | 2013 | 100   | 2455 | 63.1 | 44 (34-53) | 109 | 2.63 (1.90, 3.64) |
| Moldova                      | MDA | L-MIC | 2013 | 84    | 3149 | 64.0 | 51 (38-59) | 302 | 2.63 (2.17, 3.19) |
| Tajikistan                   | TJK | L-MIC | 2016 | 94    | 2130 | 58.2 | 42 (33-52) | 75  | 2.63 (1.91, 3.61) |
| Turkmenistan                 | TKM | UMIC  | 2018 | 94    | 3291 | 56.8 | 42 (33-52) | 80  | 2.63 (1.89, 3.66) |
| <b>Western Pacific</b>       |     |       |      |       |      |      |            |     |                   |
| Kiribati                     | KIR | L-MIC | 2015 | 55    | 899  | 56.0 | 41 (32-51) | 80  | 2.63 (1.44, 4.75) |
| Mongolia                     | MNG | L-MIC | 2019 | 98    | 5280 | 55.3 | 43 (34-54) | 301 | 2.63 (2.20, 3.15) |

|                        |     |       |      |            |         |      |            |      |                   |
|------------------------|-----|-------|------|------------|---------|------|------------|------|-------------------|
| Solomon Islands        | SLB | L-MIC | 2015 | 58         | 1397    | 54.3 | 42 (34-51) | 59   | 2.63 (1.83, 3.77) |
| Tokelau                | TK  | UMIC  | 2014 | 70         | 403     | 52.6 | 43 (32-53) | 96   | 2.63 (0.83, 8.07) |
| Tuvalu                 | TUV | UMIV  | 2015 | 76         | 824     | 54.6 | 47 (34-56) | 89   | 2.63 (0.92, 7.33) |
| Vietnam                | VNM | L-MIC | 2015 | 97         | 2721    | 57.3 | 45 (37-55) | 88   | 2.63 (1.98, 3.49) |
| <b>South-East Asia</b> |     |       |      |            |         |      |            |      |                   |
| Bangladesh             | BGD | L-MIC | 2018 | 84         | 6049    | 52.5 | 40 (33-50) | 435  | 2.63 (2.28, 3.04) |
| Myanmar                | MMR | LIC   | 2014 | 94         | 7540    | 65.4 | 45 (36-54) | 479  | 2.63 (1.65, 4.18) |
| Nepal                  | NPL | LIC   | 2019 | 86         | 4321    | 63.8 | 42 (33-53) | 127  | 2.63 (1.74, 3.96) |
| Sri Lanka              | LKA | L-MIC | 2014 | 72         | 3736    | 61.3 | 46 (37-56) | 511  | 2.63 (2.28, 3.04) |
| Timor-Leste            | TLS | L-MIC | 2014 | 96         | 1926    | 56.4 | 43 (34-54) | 17   | 2.63 (1.55, 4.43) |
| <b>Total</b>           | ..  | ..    | ..   | 87 (74-95) | 110 083 | 60.0 | 43 (34-54) | 6789 |                   |

World regions are defined by WHO. CVD=cardiovascular disease. ISO=International Organization for Standardization. UMIC=Upper-middle-income country. LIC=low-income country. L-MIC=lower middle-income country. \*Income groups are defined by the World Bank fiscal year categories in the year the survey was done. †Year reflects the year(s) of survey data collection. ‡ Response rate is equal to the number of complete interviews divided by the total number of surveys. §The sample includes individuals aged 25-69 years of age. ¶ Proportion of individuals by country with a history of diabetes was calculated by new weight to represent each country equally.

Supplementary Table S2: Characteristics of study subpopulation with diabetes

| Characteristic           | Low-income countries | Lower middle-income countries | Upper-middle-income countries | Overall        |
|--------------------------|----------------------|-------------------------------|-------------------------------|----------------|
|                          | n=9 countries        | n=18 countries                | n=11 countries                | n=38 countries |
| Total No.                | 537                  | 3992                          | 2260                          | 6789           |
| Age, median (IQR), years | 51 (43, 60)          | 54 (45, 61)                   | 55 (47, 62)                   | 54 (45, 61)    |
| Age group, years         |                      |                               |                               |                |

|                             |                   |                   |                   |                   |
|-----------------------------|-------------------|-------------------|-------------------|-------------------|
| 25-44                       | 27.3 (19.7, 36.4) | 17.1 (14.7, 19.9) | 15.4 (13.0, 18.1) | 18.2 (16.2, 20.4) |
| 45-54                       | 34.6 (27.9, 42.0) | 40.0 (37.6, 43.3) | 36.9 (33.9, 40.0) | 38.5 (36.4, 40.6) |
| 55-69                       | 38.1 (30.8, 45.9) | 42.5 (39.7, 45.2) | 47.7 (44.1, 51.4) | 43.3 (41.1, 45.5) |
| <b>Sex</b>                  |                   |                   |                   |                   |
| Female                      | 52.3 (44.3, 60.2) | 44.4 (41.4, 47.4) | 43.0 (40.2, 45.8) | 54.8 (52.5, 57.0) |
| Male                        | 47.7 (39.8, 55.7) | 55.6 (52.6, 58.6) | 57.1 (54.2, 59.8) | 45.2 (43.0, 47.5) |
| <b>Education</b>            |                   |                   |                   |                   |
| No formal schooling         | 26.3 (20.4, 33.1) | 10.0 (8.3, 12.0)  | 9.5 (5.9, 9.5)    | 11.9 (10.4, 13.6) |
| Primary                     | 40.3 (31.9, 49.3) | 34.6 (31.5, 37.9) | 43.7 (36.4, 51.5) | 38.1 (34.9, 41.5) |
| Secondary or higher         | 33.4 (26.7, 40.9) | 55.4 (52.2, 58.6) | 48.7 (41.8, 55.7) | 50.0 (46.9, 53.0) |
| <b>Hypertension</b>         |                   |                   |                   |                   |
| Yes                         | 66.8 (58.8, 74.0) | 56.5 (53.5, 59.4) | 61.0 (57.0, 64.8) | 59.4 (57.0, 61.7) |
| <b>Hypercholesterolemia</b> |                   |                   |                   |                   |
| Yes                         | 20.8 (15.5, 27.4) | 27.9 (25.5, 30.5) | 41.2 (37.8, 44.7) | 18.2 (16.5, 20.0) |

Sampling weights were adjusted to represent each country equally.

Supplementary Table S3: Individual characteristics of the diabetes, high risk of CVD and established CVD group

| Characteristics | Diabetes (N=6789) |             | 10 years CVD risk >20% (N=1150) |             | With established CVD and diabetes (N=1292) |             |
|-----------------|-------------------|-------------|---------------------------------|-------------|--------------------------------------------|-------------|
|                 | Unweighted, n     | Weighted, % | Unweighted, n                   | Weighted, % | Unweighted, n                              | Weighted, % |
| <b>Age</b>      |                   |             |                                 |             |                                            |             |
| 25-39 years     | 878               | 18.2        | 3                               | 0.6         | 104                                        | 12.2        |
| 40-54 years     | 2610              | 38.5        | 169                             | 7.7         | 424                                        | 15.1        |
| 55-69 years     | 3301              | 43.3        | 1401                            | 36.1        | 764                                        | 20.7        |
| <b>Sex</b>      |                   |             |                                 |             |                                            |             |

|                                |      |      |     |      |     |      |
|--------------------------------|------|------|-----|------|-----|------|
| Male                           | 2479 | 45.2 | 694 | 23.7 | 473 | 16.7 |
| Female                         | 4310 | 54.8 | 879 | 14.6 | 819 | 17.3 |
| <b>Country economic status</b> |      |      |     |      |     |      |
| Upper-middle                   | 2260 | 28.9 | 729 | 26.6 | 422 | 18.6 |
| Lower-middle                   | 3992 | 55.3 | 741 | 16.2 | 755 | 15.7 |
| Low                            | 537  | 15.8 | 103 | 13.0 | 115 | 18.4 |
| <b>Region</b>                  |      |      |     |      |     |      |
| Africa                         | 889  | 28.9 | 104 | 7.6  | 109 | 11.4 |
| Americas                       | 367  | 5.3  | 3   | 1.1  | 48  | 13.6 |
| Western Pacific                | 713  | 15.8 | 115 | 10.7 | 160 | 16.8 |
| European                       | 1398 | 21.1 | 693 | 44.5 | 432 | 29.0 |
| Eastern Mediterranean          | 1853 | 15.8 | 589 | 30.2 | 273 | 15.9 |
| South-East Asia                | 1569 | 13.2 | 69  | 4.6  | 270 | 12.9 |
| <b>Education</b>               |      |      |     |      |     |      |
| No schooling                   | 951  | 11.9 | 240 | 18.8 | 149 | 15.3 |
| Primary                        | 2493 | 38.1 | 455 | 13.2 | 433 | 15.4 |
| Secondary or higher            | 3128 | 50.0 | 815 | 22.7 | 667 | 18.0 |
| <b>Area of residence</b>       |      |      |     |      |     |      |
| Urban                          | 2599 | 56.2 | 683 | 21.0 | 533 | 19.4 |
| Rural                          | 1607 | 43.8 | 428 | 18.3 | 279 | 16.2 |

CVD=cardiovascular. Prevalence was calculated based on the adjusted weight, giving equal weight to each country.

### Appendix 3: Prevalence of treatment, metabolic and lifestyle targets for CVD prevention in patients with diabetes, by region and country

Supplementary Table S4: Prevalence of treatment, metabolic and lifestyle targets for CVD prevention in patients with diabetes, by income group

Prevalence (95% CI)



|                                              | Overall              | Upper-Middle Income Countries | Lower-Middle Income Countries | Low-Income Countries |
|----------------------------------------------|----------------------|-------------------------------|-------------------------------|----------------------|
| <b>A. Treatment targets</b>                  |                      |                               |                               |                      |
| Glucose-lowering drug                        | 57.86 (55.42, 60.25) | 67.65 (63.67, 71.39)          | 52.93 (49.61, 56.22)          | 56.15 (47.18, 64.73) |
| Statins                                      | 11.14 (9.85, 12.58)  | 17.90 (15.07, 21.13)          | 8.16 (6.92, 9.60)             | 8.64 (4.73, 15.27)   |
| Antihypertensive drug                        | 54.72 (51.84, 57.57) | 63.04 (58.29, 67.55)          | 51.77 (48.02, 55.51)          | 49.77 (39.40, 60.16) |
| Aspirin                                      | 26.52 (22.86, 30.54) | 35.20 (30.04, 40.73)          | 19.63 (15.84, 24.06)          | 34.75 (20.96, 51.67) |
| <b>B. Metabolic targets</b>                  |                      |                               |                               |                      |
| Fasting blood glucose <6.1 mmol/L            | 43.67 (41.17, 46.19) | 37.40 (33.51, 41.45)          | 44.87 (41.78, 48.01)          | 50.92 (42.91, 58.89) |
| Body mass index <25 kg/m <sup>2</sup>        | 27.25 (24.83, 29.80) | 15.02 (12.23, 18.31)          | 29.78 (27.11, 32.61)          | 40.78 (32.58, 49.52) |
| Blood pressure <140/90 mm Hg                 | 48.72 (46.53, 50.92) | 48.72 (45.60, 51.85)          | 49.30 (46.54, 52.07)          | 46.70 (38.53, 55.06) |
| Total cholesterol <5.0 mmol/L                | 59.24 (56.91, 61.53) | 54.74 (51.01, 58.43)          | 60.14 (57.25, 62.96)          | 64.35 (56.60, 71.43) |
| <b>C. Lifestyle targets</b>                  |                      |                               |                               |                      |
| Not currently smoking                        | 83.82 (81.56, 85.86) | 78.39 (73.48, 82.61)          | 83.88 (81.33, 86.13)          | 93.59 (89.16, 96.29) |
| Not currently drinking                       | 79.84 (77.86, 81.68) | 82.83 (79.31, 85.86)          | 78.28 (75.67, 80.69)          | 79.78 (72.59, 85.46) |
| Sufficient physical activity                 | 53.68 (51.36, 55.99) | 45.37 (41.63, 49.17)          | 54.82 (51.71, 57.90)          | 64.93 (57.83, 71.43) |
| Dietary fruit and vegetables ≥5 servings/day | 19.51 (17.69, 21.46) | 19.59 (16.46, 23.16)          | 21.08 (18.74, 23.62)          | 13.86 (8.89, 20.96)  |

Prevalence was calculated based on the adjusted weight, giving equal weight to each country. The prevalence of statin use was assessed only in people with diabetes

aged 40 years or older. The prevalence of aspirin use was assessed in people with diabetes with a history of CVD and a 10-year risk of CVD greater than 20%, as calculated using the WHO CVD Risk Laboratory-based Chart. Bangladesh, Myanmar, Nepal, Sri Lanka and Timor-Leste have a body mass index target of less than 23 kg/m<sup>2</sup>. Total cholesterol targets were set at less than 5.0 mmol/L (190 mg/dL) for patients without a history of CVD and less than 4.0 mmol/L (152 mg/dL) for patients with a history of CVD.

Supplementary Table S5: Prevalence of treatment, metabolic and lifestyle targets for CVD prevention in patients with diabetes, by region

Treatment targets

| Region                | Prevalence (95% CI)   |                      |                       |                      |                      |
|-----------------------|-----------------------|----------------------|-----------------------|----------------------|----------------------|
|                       | Glucose-lowering drug | Statins              | Antihypertensive drug | Aspirin              | All 4 targets met    |
| Africa                | 54.56 (48.93, 60.07)  | 8.95 (6.40, 12.38)   | 49.84 (43.29, 56.40)  | 21.93 (13.31, 33.95) | 8.41 (6.03, 11.60)   |
| Americas              | 63.23 (55.84, 70.04)  | 8.77 (5.47, 13.75)   | 58.71 (50.39, 66.55)  | 25.00 (12.89, 42.87) | 8.63 (4.87, 14.84)   |
| Western Pacific       | 45.49 (38.10, 53.09)  | 6.66 (4.62, 9.51)    | 45.14 (37.05, 53.49)  | 16.90 (11.90, 23.45) | 6.30 (4.38, 8.97)    |
| European              | 58.07 (54.00, 62.04)  | 11.32 (8.67, 14.66)  | 58.97 (54.33, 63.46)  | 38.13 (33.31, 43.20) | 7.47 (5.39, 10.25)   |
| Eastern Mediterranean | 67.06 (63.42, 70.50)  | 20.48 (17.26, 24.12) | 64.91 (60.68, 68.92)  | 37.95 (32.03, 44.26) | 18.17 (14.79, 22.12) |
| South-East Asia       | 67.59 (60.18, 74.21)  | 10.13 (7.95, 12.83)  | 56.31 (47.29, 64.94)  | 16.49 (10.81, 24.36) | 11.59 (7.29, 17.92)  |

Prevalence was calculated using adjusted weight, giving each country equal weight. The prevalence of statin use was assessed only in people with diabetes aged 40 years or older. The prevalence of aspirin use was assessed in people with diabetes with a history of CVD and a 10-year risk of CVD greater than 20%, as calculated using the WHO CVD Risk Laboratory-based Chart.

Metabolic targets

| Region   | Prevalence (95% CI)                   |                              |                               |                                   |                     |
|----------|---------------------------------------|------------------------------|-------------------------------|-----------------------------------|---------------------|
|          | Body mass index <25 kg/m <sup>2</sup> | Blood pressure <140/90 mm Hg | Total cholesterol <5.0 mmol/L | Fasting blood-glucose <6.1 mmol/L | All 4 targets met   |
| Africa   | 50.58 (45.26, 55.88)                  | 37.22 (32.04, 42.71)         | 49.84 (44.59, 55.08)          | 68.21 (63.22, 72.81)              | 11.97 (7.96, 17.62) |
| Americas | 44.44 (36.97, 52.17)                  | 25.32 (19.10, 32.75)         | 67.32 (59.70, 74.13)          | 47.59 (40.70, 54.57)              | 5.65 (3.32, 9.46)   |

|                       |                      |                      |                      |                      |                      |
|-----------------------|----------------------|----------------------|----------------------|----------------------|----------------------|
| Western Pacific       | 43.12 (35.17, 51.44) | 22.41 (16.28, 30.01) | 56.11 (50.61, 61.47) | 49.86 (44.47, 55.25) | 6.73 (4.21, 10.60)   |
| European              | 38.16 (34.53, 41.94) | 14.81 (12.13, 17.96) | 31.02 (27.56, 34.70) | 49.66 (45.52, 53.81) | 2.55 (1.66, 3.91)    |
| Eastern Mediterranean | 36.79 (33.14, 40.60) | 21.02 (18.04, 24.36) | 48.78 (44.66, 52.91) | 61.07 (56.89, 65.10) | 4.23 (2.94, 6.05)    |
| South-East Asia       | 45.85 (39.56, 52.27) | 39.25 (32.79, 46.11) | 58.22 (52.23, 63.98) | 68.57 (62.10, 74.39) | 15.65 (10.15, 23.35) |

Prevalence was calculated using adjusted weight, giving each country equal weight. Bangladesh, Myanmar, Nepal, Sri Lanka and Timor-Leste have a body mass index target of less than 23 kg/m<sup>2</sup>. Total cholesterol targets were set at less than 5.0 mmol/L (190 mg/dL) for patients without a history of CVD and less than 4.0 mmol/L (152 mg/dL) for patients with a history of CVD.

#### Lifestyle targets

| Region                | Prevalence (95% CI)   |                        |                              |                                      |                      |
|-----------------------|-----------------------|------------------------|------------------------------|--------------------------------------|----------------------|
|                       | Not currently smoking | Not currently drinking | Sufficient physical activity | Fruit and vegetables ≥5 servings/day | All 4 targets met    |
| Africa                | 94.75 (92.21, 96.49)  | 77.51 (72.74, 81.66)   | 63.68 (58.83, 68.26)         | 17.27 (13.51, 21.82)                 | 7.06 (4.58, 10.73)   |
| Americas              | 89.38 (84.75, 92.73)  | 71.62 (65.31, 77.18)   | 47.81 (41.11, 54.59)         | 4.78 (2.63, 8.56)                    | 1.04 (0.17, 5.93)    |
| Western Pacific       | 65.76 (58.92, 72.01)  | 74.44 (68.79, 79.38)   | 58.26 (50.88, 65.29)         | 15.71 (11.34, 21.37)                 | 6.17 (3.77, 9.93)    |
| European              | 86.42 (83.23, 89.09)  | 69.02 (65.02, 72.75)   | 48.19 (44.02, 52.39)         | 34.22 (30.50, 38.14)                 | 12.96 (10.47, 15.94) |
| Eastern Mediterranean | 80.71 (77.29, 83.72)  | 98.86 (97.62, 99.46)   | 36.16 (32.63, 39.84)         | 14.26 (12.11, 16.71)                 | 3.82 (2.86, 5.07)    |
| South-East Asia       | 78.82 (71.80, 84.48)  | 89.20 (84.89, 92.38)   | 58.37 (52.19, 64.29)         | 17.64 (12.91, 23.61)                 | 5.88 (4.51, 7.64)    |

Prevalence was calculated using adjusted weight, giving each country equal weight.

#### Supplementary Table S6: Prevalence of treatment, metabolic and lifestyle targets for CVD prevention in patients with diabetes, by country

##### Treatment targets

| Country     | Prevalence (95% CI)   |                     |                       |                      |                      |
|-------------|-----------------------|---------------------|-----------------------|----------------------|----------------------|
|             | Glucose-lowering drug | Statins             | Antihypertensive drug | Aspirin              | All 4 targets met    |
| Afghanistan | 65.63 (50.05, 78.44)  | 16.27 (7.32, 32.33) | 78.40 (63.51, 88.33)  | 47.04 (24.66, 70.69) | 23.41 (13.74, 36.96) |

|                       |                      |                      |                      |                      |                      |
|-----------------------|----------------------|----------------------|----------------------|----------------------|----------------------|
| Algeria               | 79.14 (72.57, 84.47) | 24.87 (18.96, 31.89) | 53.86 (46.02, 61.52) | 37.32 (26.90, 49.07) | 18.77 (14.24, 24.34) |
| Armenia               | 62.95 (49.32, 74.79) | 5.66 (2.02, 14.86)   | 44.50 (31.81, 57.95) | 12.62 (5.58, 26.07)  | 2.01 (0.57, 6.85)    |
| Azerbaijan            | 76.28 (67.09, 83.53) | 9.66 (5.12, 17.49)   | 60.10 (51.09, 68.47) | 30.15 (19.62, 43.28) | 8.58 (4.66, 15.26)   |
| Bangladesh            | 85.98 (77.85, 91.46) | 13.20 (7.82, 21.43)  | 63.98 (55.06, 72.03) | 27.68 (16.38, 42.78) | 9.75 (5.91, 15.66)   |
| Belarus               | 50.13 (43.68, 56.59) | 11.09 (7.25, 16.58)  | 70.86 (64.27, 76.67) | 38.85 (32.16, 46.00) | 8.39 (5.21, 13.24)   |
| Benin                 | 72.79 (54.58, 85.62) | 8.19 (1.22, 39.20)   | 61.58 (38.00, 80.74) | 29.86 (6.12, 73.53)  | 10.84 (2.76, 34.25)  |
| Botswana              | 60.05 (47.01, 71.82) | 4.91 (1.47, 15.17)   | 72.97 (59.64, 83.14) | 2.81 (0.35, 19.07)   | 6.94 (2.10, 20.61)   |
| Cabo Verde            | 72.89 (63.03, 80.92) | 26.50 (17.03, 38.78) | 75.07 (63.02, 84.18) | 44.70 (23.52, 68.00) | 22.26 (13.73, 33.99) |
| Ecuador               | 50.35 (42.91, 57.78) | 9.75 (5.76, 16.05)   | 57.79 (48.29, 66.75) | 15.56 (6.53, 32.72)  | 6.28 (3.40, 11.30)   |
| Eswatini              | 68.01 (53.69, 79.59) | 4.58 (0.94, 19.60)   | 57.77 (41.08, 72.86) | 22.89 (4.20, 66.75)  | 3.19 (1.04, 9.38)    |
| Ethiopia              | 67.85 (51.63, 80.68) | 6.28 (1.05, 29.66)   | 23.53 (12.00, 40.99) | 2.75 (0.34, 19.19)   | 10.50 (3.95, 25.05)  |
| Georgia               | 62.12 (53.66, 69.90) | 12.30 (7.45, 19.63)  | 70.25 (60.14, 78.71) | 22.20 (15.19, 31.24) | 6.21 (3.15, 11.86)   |
| Guyana                | 75.22 (62.91, 84.46) | 7.82 (3.44, 16.82)   | 59.62 (45.85, 72.03) | 34.43 (13.64, 63.58) | 10.99 (4.77, 23.31)  |
| Iraq                  | 72.76 (66.48, 78.24) | 8.25 (5.24, 12.74)   | 62.03 (55.15, 68.45) | 27.65 (19.94, 36.96) | 6.61 (4.30, 10.03)   |
| Jordan                | 83.23 (77.72, 87.60) | 36.11 (29.08, 43.80) | 74.23 (66.72, 80.53) | 63.60 (53.26, 72.83) | 29.87 (23.44, 37.19) |
| Kenya                 | 40.00 (23.49, 59.15) | 0.63 (0.09, 4.50)    | 21.96 (11.53, 37.78) | 4.51 (0.56, 28.41)   | 3.75 (1.29, 10.41)   |
| Kiribati              | 56.53 (27.89, 81.39) | 1.39 (0.31, 6.12)    | 28.81 (13.53, 51.13) | 23.72 (6.45, 58.37)  | 4.92 (1.84, 12.53)   |
| Kyrgyzstan            | 52.08 (37.90, 65.93) | 6.81 (2.50, 17.21)   | 52.18 (36.98, 66.99) | 46.38 (32.56, 60.78) | 5.28 (1.75, 14.86)   |
| Lebanon               | 89.24 (78.25, 95.03) | 47.16 (35.92, 58.70) | 82.60 (71.81, 89.84) | 58.50 (43.67, 71.94) | 38.11 (26.66, 51.05) |
| Malawi                | 46.41 (17.55, 77.89) | 13.85 (2.80, 47.26)  | 46.31 (14.91, 80.94) | 75.21 (30.61, 95.43) | 10.26 (1.74, 42.40)  |
| Moldova               | 34.34 (28.16, 41.09) | 11.16 (6.68, 18.06)  | 56.90 (48.44, 64.98) | 36.92 (29.65, 44.84) | 5.07 (2.71, 9.29)    |
| Mongolia              | 29.30 (23.50, 35.86) | 10.36 (6.71, 15.68)  | 68.04 (59.13, 75.81) | 34.55 (25.89, 44.37) | 5.62 (3.39, 9.18)    |
| Morocco               | 19.56 (15.46, 24.42) | 6.80 (4.53, 10.08)   | 47.28 (40.81, 53.83) | 9.44 (5.34, 16.15)   | 4.28 (2.35, 7.66)    |
| Myanmar               | 68.36 (61.50, 74.51) | 5.90 (3.64, 9.43)    | 49.53 (35.85, 63.28) | 12.82 (7.82, 20.31)  | 5.56 (3.30, 9.23)    |
| Nepal                 | 77.59 (51.11, 91.98) | 1.71 (0.58, 4.94)    | 36.19 (21.80, 53.57) | 0.00 (0.00, 0.00)    | 4.14 (1.52, 10.78)   |
| Sao Tome and Principe | 24.27 (14.42, 37.86) | 0.00 (0.00, 0.00)    | 50.60 (37.07, 64.05) | 0.00 (0.00, 0.00)    | 3.24 (0.64, 14.82)   |

|                 |                      |                      |                      |                      |                      |
|-----------------|----------------------|----------------------|----------------------|----------------------|----------------------|
| Solomon Islands | 7.30 (2.70, 18.29)   | 0.74 (0.10, 5.26)    | 17.43 (7.72, 34.74)  | 2.67 (0.35, 17.77)   | 2.32 (0.33, 14.65)   |
| Sri Lanka       | 68.46 (63.44, 73.08) | 25.71 (21.34, 30.62) | 56.49 (50.47, 62.32) | 41.97 (29.65, 55.39) | 19.33 (15.65, 23.64) |
| Sudan           | 71.65 (65.80, 76.85) | 7.81 (4.45, 13.35)   | 44.94 (36.66, 53.50) | 21.50 (12.95, 33.51) | 6.74 (4.64, 9.69)    |
| Tajikistan      | 54.43 (40.29, 67.89) | 6.93 (1.90, 22.31)   | 51.54 (35.40, 67.36) | 36.24 (20.70, 55.31) | 3.39 (1.06, 10.36)   |
| Timor-Leste     | 39.08 (15.56, 69.07) | 0.00 (0.00, 0.00)    | 75.38 (39.07, 93.60) | 0.00 (0.00, 0.00)    | 19.15 (4.89, 52.18)  |
| Tokelau         | 63.23 (54.91, 70.83) | 15.10 (9.69, 22.77)  | 62.73 (59.45, 65.89) | 31.04 (21.09, 43.12) | 15.02 (8.92, 24.18)  |
| Turkmenistan    | 74.90 (60.32, 85.42) | 26.34 (14.10, 43.79) | 65.45 (48.79, 79.01) | 81.69 (65.83, 91.18) | 20.81 (10.05, 38.19) |
| Tuvalu          | 45.13 (34.41, 56.33) | 1.22 (0.43, 3.42)    | 30.85 (18.53, 46.65) | 0.00 (0.00, 0.00)    | 5.31 (2.77, 9.95)    |
| Uganda          | 31.25 (15.43, 53.12) | 2.93 (0.40, 18.56)   | 36.62 (16.37, 63.04) | 7.26 (0.90, 40.27)   | 2.33 (0.32, 15.08)   |
| Vietnam         | 72.67 (58.87, 83.16) | 11.62 (6.40, 20.18)  | 62.97 (41.69, 80.17) | 9.43 (3.55, 22.76)   | 4.61 (2.12, 9.70)    |
| Zambia          | 34.86 (19.88, 53.58) | 2.81 (0.81, 9.24)    | 47.97 (25.94, 70.82) | 13.93 (2.73, 48.28)  | 0.43 (0.06, 3.06)    |

The estimates account for weighting and survey design. The prevalence of statin use was assessed only in people with diabetes aged 40 years or older. The prevalence of aspirin use was assessed in people with diabetes with a history of CVD and a 10-year risk of CVD greater than 20%, as calculated using the WHO CVD Risk Laboratory-based Chart.

#### Metabolic targets

| Country     | Prevalence (95% CI)                   |                              |                               |                                   |                     |
|-------------|---------------------------------------|------------------------------|-------------------------------|-----------------------------------|---------------------|
|             | Body mass index <25 kg/m <sup>2</sup> | Blood pressure <140/90 mm Hg | Total cholesterol <5.0 mmol/L | Fasting blood-glucose <6.1 mmol/L | All 4 targets met   |
| Afghanistan | 47.90 (35.35, 60.72)                  | 21.48 (12.26, 34.88)         | 38.40 (23.99, 55.18)          | 59.86 (44.19, 73.75)              | 6.78 (2.46, 17.36)  |
| Algeria     | 30.99 (24.32, 38.55)                  | 21.62 (16.60, 27.65)         | 56.32 (49.71, 62.72)          | 70.64 (63.33, 77.03)              | 3.96 (1.72, 8.84)   |
| Armenia     | 36.38 (24.57, 50.09)                  | 19.32 (10.56, 32.68)         | 44.00 (31.58, 57.22)          | 70.76 (58.98, 80.29)              | 3.34 (1.33, 8.15)   |
| Azerbaijan  | 22.47 (15.61, 31.23)                  | 13.51 (8.85, 20.08)          | 38.17 (29.33, 47.86)          | 38.23 (29.93, 47.27)              | 2.41 (0.75, 7.52)   |
| Bangladesh  | 36.32 (28.80, 44.57)                  | 29.67 (23.31, 36.93)         | 58.44 (51.41, 65.15)          | 56.90 (48.44, 64.97)              | 5.96 (3.15, 10.99)  |
| Belarus     | 53.01 (46.40, 59.51)                  | 12.33 (8.68, 17.22)          | 27.10 (21.36, 33.71)          | 48.66 (42.01, 55.35)              | 3.18 (1.64, 6.10)   |
| Benin       | 46.27 (28.49, 65.06)                  | 38.24 (22.33, 57.14)         | 43.07 (25.71, 62.31)          | 50.16 (32.00, 68.27)              | 12.48 (3.81, 33.89) |

|                       |                      |                      |                      |                      |                      |
|-----------------------|----------------------|----------------------|----------------------|----------------------|----------------------|
| Botswana              | 54.04 (40.96, 66.59) | 24.64 (13.21, 41.26) | 44.82 (32.36, 57.96) | 86.46 (74.12, 93.43) | 2.23 (0.53, 8.81)    |
| Cabo Verde            | 34.48 (25.16, 45.16) | 31.41 (22.47, 41.98) | 51.53 (40.94, 61.98) | 65.20 (55.22, 74.01) | 3.65 (1.66, 7.83)    |
| Ecuador               | 52.08 (44.54, 59.52) | 22.86 (17.12, 29.84) | 78.78 (72.33, 84.05) | 57.54 (50.15, 64.60) | 7.26 (4.13, 12.45)   |
| Eswatini              | 37.16 (24.31, 52.13) | 14.49 (7.58, 25.93)  | 43.07 (28.53, 58.90) | 79.76 (68.85, 87.53) | 4.67 (1.63, 12.71)   |
| Ethiopia              | 36.21 (23.15, 51.68) | 56.15 (41.06, 70.17) | 55.15 (40.97, 68.55) | 81.79 (67.67, 90.60) | 18.74 (9.78, 32.92)  |
| Georgia               | 43.87 (36.09, 51.96) | 8.70 (5.10, 14.44)   | 36.75 (29.70, 44.42) | 52.38 (44.54, 60.10) | 0.76 (0.11, 5.17)    |
| Guyana                | 36.80 (24.83, 50.66) | 27.78 (17.38, 41.29) | 55.87 (43.15, 67.86) | 37.65 (27.21, 49.38) | 4.04 (1.38, 11.23)   |
| Iraq                  | 33.97 (27.69, 40.86) | 12.42 (8.78, 17.29)  | 42.28 (36.19, 48.62) | 43.69 (37.11, 50.51) | 0.31 (0.07, 1.44)    |
| Jordan                | 47.59 (40.80, 54.48) | 8.34 (5.31, 12.89)   | 62.00 (55.16, 68.39) | 76.22 (69.64, 81.75) | 3.53 (1.81, 6.79)    |
| Kenya                 | 56.42 (36.98, 74.07) | 33.18 (20.62, 48.70) | 33.61 (20.04, 50.56) | 79.28 (65.07, 88.71) | 11.37 (4.54, 25.72)  |
| Kiribati              | 17.89 (7.96, 35.42)  | 8.87 (4.21, 17.74)   | 44.33 (33.77, 55.43) | 55.67 (40.32, 70.01) | 2.11 (0.51, 8.38)    |
| Kyrgyzstan            | 36.71 (25.69, 49.31) | 16.08 (8.84, 27.45)  | 28.94 (18.48, 42.24) | 48.28 (34.73, 62.10) | 2.34 (0.51, 9.96)    |
| Lebanon               | 34.17 (23.00, 47.44) | 26.18 (16.93, 38.17) | 57.47 (45.60, 68.54) | 37.66 (26.29, 50.57) | 2.53 (0.85, 7.30)    |
| Malawi                | 64.07 (37.44, 84.16) | 54.41 (26.03, 80.19) | 77.20 (46.85, 92.86) | 63.86 (35.40, 85.07) | 24.14 (4.17, 69.94)  |
| Moldova               | 52.83 (46.29, 59.28) | 14.76 (9.89, 21.46)  | 26.40 (20.28, 33.58) | 41.75 (34.71, 49.15) | 3.71 (1.83, 7.37)    |
| Mongolia              | 40.09 (33.78, 46.75) | 22.87 (17.99, 28.61) | 65.53 (58.99, 71.54) | 53.49 (46.41, 60.44) | 8.43 (5.37, 13.00)   |
| Morocco               | 28.01 (23.27, 33.31) | 23.46 (18.87, 28.78) | 50.01 (44.44, 55.57) | 84.78 (80.57, 88.21) | 4.74 (2.49, 8.85)    |
| Myanmar               | 32.84 (27.69, 38.44) | 33.27 (28.69, 38.19) | 54.02 (48.38, 59.56) | 43.32 (37.53, 49.29) | 8.73 (5.03, 14.73)   |
| Nepal                 | 25.94 (14.39, 42.19) | 41.43 (27.28, 57.15) | 57.94 (45.05, 69.84) | 78.42 (64.79, 87.78) | 10.29 (2.19, 37.02)  |
| Sao Tome and Principe | 58.35 (44.66, 70.86) | 34.45 (24.52, 45.96) | 45.10 (34.07, 56.63) | 9.73 (4.34, 20.41)   | 0.55 (0.08, 3.93)    |
| Solomon Islands       | 78.67 (66.49, 87.27) | 26.55 (16.18, 40.35) | 62.69 (47.27, 75.90) | 43.76 (31.00, 57.41) | 10.42 (3.78, 25.66)  |
| Sri Lanka             | 50.12 (44.91, 55.32) | 34.30 (29.80, 39.11) | 56.07 (51.12, 60.90) | 75.76 (70.86, 80.06) | 10.33 (7.79, 13.59)  |
| Sudan                 | 29.11 (23.34, 35.65) | 34.24 (28.52, 40.46) | 42.51 (35.75, 49.55) | 64.21 (56.31, 71.40) | 7.49 (4.57, 12.03)   |
| Tajikistan            | 28.15 (17.30, 42.33) | 18.93 (9.71, 33.63)  | 19.64 (11.36, 31.78) | 51.66 (36.04, 66.96) | 1.08 (0.23, 4.90)    |
| Timor-Leste           | 84.02 (62.37, 94.35) | 57.58 (31.15, 80.29) | 64.63 (37.98, 84.50) | 88.44 (49.95, 98.32) | 42.92 (20.61, 68.52) |
| Tokelau               | 13.44 (8.78, 20.02)  | 2.56 (1.29, 4.99)    | 60.48 (55.40, 65.34) | 37.98 (28.21, 48.83) | 0.00 (0.00, 0.00)    |

|              |                      |                      |                      |                      |                      |
|--------------|----------------------|----------------------|----------------------|----------------------|----------------------|
| Turkmenistan | 31.90 (20.77, 45.56) | 14.88 (7.80, 26.54)  | 27.18 (17.19, 40.16) | 45.60 (31.54, 60.40) | 3.60 (0.82, 14.45)   |
| Tuvalu       | 37.73 (30.83, 45.16) | 5.90 (3.04, 11.14)   | 41.35 (33.50, 49.67) | 59.51 (48.06, 70.01) | 0.49 (0.06, 4.03)    |
| Uganda       | 74.38 (52.59, 88.37) | 58.29 (36.88, 76.98) | 37.45 (20.82, 57.69) | 82.18 (66.57, 91.44) | 25.20 (12.00, 45.42) |
| Vietnam      | 70.90 (54.88, 83.00) | 67.70 (52.33, 80.01) | 62.29 (47.85, 74.84) | 48.74 (35.34, 62.32) | 18.92 (11.31, 29.92) |
| Zambia       | 64.00 (46.11, 78.69) | 42.53 (26.12, 60.77) | 60.89 (41.54, 77.34) | 81.24 (64.01, 91.34) | 24.67 (11.92, 44.20) |

The estimates account for weighting and survey design. Bangladesh, Myanmar, Nepal, Sri Lanka and Timor-Leste have a body mass index target of less than 23 kg/m<sup>2</sup>. Total cholesterol targets were set at less than 5.0 mmol/L (190 mg/dL) for patients without a history of CVD and less than 4.0 mmol/L (152 mg/dL) for patients with a history of CVD.

#### Lifestyle targets

| Country     | Prevalence (95% CI)   |                        |                              |                                            |                      |
|-------------|-----------------------|------------------------|------------------------------|--------------------------------------------|----------------------|
|             | Not currently smoking | Not currently drinking | Sufficient physical activity | Fruit and vegetables $\geq 5$ servings/day | All 4 targets met    |
| Afghanistan | 93.82 (81.32, 98.15)  | 0.00 (0.00, 0.00)      | 39.06 (27.63, 51.83)         | 1.02 (0.19, 5.30)                          | 0.09 (0.01, 0.68)    |
| Algeria     | 91.30 (84.79, 95.18)  | 99.50 (96.59, 99.93)   | 37.44 (30.46, 44.98)         | 18.95 (12.50, 27.66)                       | 7.80 (4.27, 13.83)   |
| Armenia     | 72.44 (56.23, 84.32)  | 58.63 (44.64, 71.35)   | 44.23 (31.84, 57.37)         | 17.10 (9.79, 28.15)                        | 7.57 (3.10, 17.34)   |
| Azerbaijan  | 90.25 (84.74, 93.92)  | 90.85 (84.88, 94.61)   | 41.29 (33.07, 50.04)         | 36.53 (27.99, 46.02)                       | 12.12 (7.81, 18.33)  |
| Bangladesh  | 82.98 (75.07, 88.75)  | 99.96 (99.70, 99.99)   | 60.41 (52.28, 68.01)         | 14.10 (9.44, 20.54)                        | 6.86 (4.07, 11.34)   |
| Belarus     | 83.09 (77.45, 87.55)  | 51.52 (44.85, 58.14)   | 44.58 (37.44, 51.96)         | 26.64 (21.12, 33.00)                       | 6.20 (3.85, 9.84)    |
| Benin       | 93.56 (66.16, 99.08)  | 80.26 (58.14, 92.25)   | 59.94 (41.30, 76.08)         | 6.57 (1.74, 21.85)                         | 2.64 (0.51, 12.49)   |
| Botswana    | 96.44 (88.80, 98.93)  | 84.37 (70.56, 92.40)   | 58.76 (46.49, 70.04)         | 11.71 (4.32, 28.03)                        | 6.00 (1.21, 24.99)   |
| Cabo Verde  | 92.28 (84.33, 96.37)  | 68.13 (57.53, 77.13)   | 44.19 (33.39, 55.56)         | 20.09 (12.97, 29.77)                       | 7.67 (3.99, 14.25)   |
| Ecuador     | 84.61 (77.90, 89.55)  | 63.17 (55.93, 69.85)   | 60.31 (53.46, 66.79)         | 6.39 (3.44, 11.54)                         | 0.19 (0.03, 1.38)    |
| Eswatini    | 98.00 (90.74, 99.59)  | 93.25 (84.52, 97.21)   | 63.29 (46.94, 77.07)         | 10.20 (3.31, 27.35)                        | 3.02 (1.06, 8.35)    |
| Ethiopia    | 96.19 (85.50, 99.09)  | 72.32 (56.06, 84.26)   | 66.84 (54.27, 77.39)         | 10.23 (3.66, 25.50)                        | 9.09 (2.92, 24.95)   |
| Georgia     | 76.03 (67.42, 82.93)  | 70.04 (62.01, 77.00)   | 47.51 (39.04, 56.12)         | 41.10 (33.14, 49.56)                       | 15.38 (10.53, 21.92) |

|                       |                      |                      |                      |                      |                      |
|-----------------------|----------------------|----------------------|----------------------|----------------------|----------------------|
| Guyana                | 94.16 (86.48, 97.60) | 80.07 (69.60, 87.58) | 35.31 (25.66, 46.32) | 3.18 (0.87, 11.01)   | 1.88 (0.26, 12.19)   |
| Iraq                  | 76.82 (70.24, 82.32) | 99.96 (99.68, 99.99) | 16.12 (12.36, 20.76) | 18.12 (13.62, 23.70) | 2.57 (1.33, 4.92)    |
| Jordan                | 68.56 (61.49, 74.85) | 99.18 (96.83, 99.79) | 46.45 (39.74, 53.29) | 19.32 (14.45, 25.35) | 8.04 (4.82, 13.11)   |
| Kenya                 | 86.24 (70.31, 94.31) | 85.01 (67.29, 93.99) | 73.25 (53.74, 86.58) | 12.62 (5.11, 27.91)  | 9.81 (3.23, 26.16)   |
| Kiribati              | 60.48 (49.99, 70.08) | 90.49 (70.71, 97.40) | 31.30 (14.44, 55.15) | 0.92 (0.13, 6.50)    | 0.00 (0.00, 0.00)    |
| Kyrgyzstan            | 83.96 (71.49, 91.61) | 53.17 (38.99, 66.85) | 58.70 (45.03, 71.16) | 25.22 (15.82, 37.69) | 5.06 (2.37, 10.49)   |
| Lebanon               | 56.83 (45.38, 67.60) | 94.35 (87.40, 97.57) | 14.83 (7.87, 26.19)  | 16.88 (10.17, 26.70) | 0.82 (0.11, 5.63)    |
| Malawi                | 95.73 (73.90, 99.44) | 91.18 (56.50, 98.80) | 92.76 (71.07, 98.52) | 11.25 (2.25, 41.07)  | 2.14 (0.48, 9.08)    |
| Moldova               | 91.48 (86.20, 94.86) | 40.89 (33.79, 48.40) | 56.84 (48.74, 64.60) | 33.29 (26.16, 41.27) | 8.88 (5.25, 14.63)   |
| Mongolia              | 70.17 (63.02, 76.45) | 56.48 (49.68, 63.05) | 56.40 (49.73, 62.86) | 13.49 (9.55, 18.71)  | 4.99 (2.72, 8.96)    |
| Morocco               | 94.55 (91.24, 96.66) | 99.67 (97.72, 99.95) | 46.57 (41.08, 52.15) | 20.25 (16.27, 24.92) | 7.53 (5.19, 10.80)   |
| Myanmar               | 86.00 (81.85, 89.32) | 87.22 (78.88, 92.58) | 50.79 (43.32, 58.21) | 19.72 (9.56, 36.34)  | 6.53 (3.38, 12.25)   |
| Nepal                 | 76.65 (63.69, 86.00) | 91.29 (83.55, 95.58) | 62.80 (48.04, 75.51) | 7.88 (2.20, 24.51)   | 2.72 (0.76, 9.25)    |
| Sao Tome and Principe | 98.06 (92.48, 99.52) | 32.08 (22.13, 43.96) | 69.14 (57.68, 78.65) | 49.27 (34.37, 64.30) | 7.42 (3.39, 15.48)   |
| Solomon Islands       | 75.92 (62.27, 85.76) | 94.90 (87.41, 98.04) | 81.25 (66.76, 90.33) | 17.01 (9.48, 28.64)  | 12.25 (5.46, 25.25)  |
| Sri Lanka             | 86.49 (82.01, 89.99) | 78.80 (73.84, 83.04) | 58.60 (53.29, 63.72) | 32.37 (27.04, 38.19) | 13.28 (10.44, 16.76) |
| Sudan                 | 93.65 (89.15, 96.36) | 0.00 (0.00, 0.00)    | 53.90 (46.33, 61.30) | 9.96 (6.36, 15.28)   | 3.85 (1.72, 8.39)    |
| Tajikistan            | 95.73 (84.35, 98.94) | 99.77 (98.36, 99.97) | 33.83 (21.76, 48.46) | 44.55 (30.87, 59.10) | 21.98 (11.61, 37.68) |
| Timor-Leste           | 62.01 (36.04, 82.54) | 88.70 (63.45, 97.26) | 59.23 (34.77, 79.84) | 14.11 (3.16, 45.24)  | 0.00 (0.00, 0.00)    |
| Tokelau               | 40.40 (27.95, 54.22) | 58.43 (45.62, 70.20) | 68.63 (62.82, 73.92) | 5.58 (3.62, 8.51)    | 1.03 (0.20, 5.08)    |
| Turkmenistan          | 98.38 (93.06, 99.64) | 87.26 (71.83, 94.84) | 58.55 (43.31, 72.30) | 49.31 (34.73, 64.01) | 26.49 (16.85, 39.04) |
| Tuvalu                | 75.64 (67.29, 82.41) | 82.56 (75.93, 87.66) | 52.13 (46.37, 57.84) | 6.11 (3.62, 10.14)   | 0.00 (0.00, 0.00)    |
| Uganda                | 98.28 (92.80, 99.61) | 81.76 (63.17, 92.13) | 72.31 (51.80, 86.38) | 28.84 (11.90, 54.87) | 20.95 (6.30, 51.10)  |
| Vietnam               | 71.98 (56.10, 83.77) | 63.79 (49.29, 76.14) | 59.86 (45.15, 72.98) | 51.16 (37.35, 64.80) | 18.74 (11.32, 29.41) |
| Zambia                | 96.15 (84.82, 99.11) | 64.76 (44.14, 81.03) | 62.56 (43.66, 78.27) | 10.25 (4.32, 22.38)  | 1.13 (0.15, 7.77)    |

The estimates account for weighting and survey design.



**Appendix 4: Prevalence of guideline-recommended targets for all treatment, metabolic and lifestyle components of CVD prevention in patients with diabetes by World Bank income group and region**

Supplementary Table S7: Prevalence of guideline-recommended targets for all treatment, metabolic and lifestyle components of CVD prevention in patients with diabetes by World Bank income group and region

By World Bank income group

|                           | Prevalence (95% CI) |                               |                               |                      |
|---------------------------|---------------------|-------------------------------|-------------------------------|----------------------|
|                           | Overall             | Upper-Middle Income Countries | Lower-Middle Income Countries | Low-Income Countries |
| Treatment targets all met | 9.85 (8.54, 11.33)  | 14.97 (12.52, 17.81)          | 7.00 (5.57, 8.76)             | 10.43 (6.45, 16.46)  |
| Metabolic targets all met | 8.09 (6.47, 10.07)  | 2.68 (1.86, 3.86)             | 8.96 (7.08, 11.28)            | 14.95 (8.61, 24.68)  |
| Lifestyle targets all met | 7.18 (6.06, 8.48)   | 6.48 (4.83, 8.63)             | 7.69 (6.45, 9.15)             | 6.66 (3.20, 13.35)   |

Prevalence has been recalculated based on the adjusted weight. This gives equal weight to each country.

By region

|                           | Prevalence (95% CI) |                    |                    |                      |                       |                      |
|---------------------------|---------------------|--------------------|--------------------|----------------------|-----------------------|----------------------|
|                           | Africa              | Americas           | Western Pacific    | Europe               | Eastern Mediterranean | South-East Asia      |
| Treatment targets all met | 8.41 (6.03, 11.60)  | 8.63 (4.87, 14.84) | 6.30 (4.38, 8.97)  | 7.47 (5.39, 10.25)   | 18.17 (14.79, 22.12)  | 11.59 (7.29, 17.92)  |
| Metabolic targets all met | 11.97 (7.96, 17.62) | 5.65 (3.32, 9.46)  | 6.73 (4.21, 10.60) | 2.55 (1.66, 3.91)    | 4.23 (2.94, 6.05)     | 15.65 (10.15, 23.35) |
| Lifestyle targets all met | 7.06 (4.58, 10.73)  | 1.04 (0.17, 5.93)  | 6.17 (3.77, 9.93)  | 12.96 (10.47, 15.94) | 3.82 (2.86, 5.07)     | 5.88 (4.51, 7.64)    |

Prevalence has been recalculated based on the adjusted weight. This gives equal weight to each country.

**Appendix 5: Association between individual characteristics and guideline-recommended treatment, metabolic and lifestyle targets in people with diabetes**

Supplementary Table S8: Association between individual characteristics and guideline-recommended treatment, metabolic and lifestyle targets in people with diabetes

(Univariate Poisson regression model)

Treatment targets

|                              | Prevalence (%)       | Estimated average<br>marginal effect (95%<br>CI) | <i>P</i> values | Risk ratio (95% CI) | <i>P</i> values |
|------------------------------|----------------------|--------------------------------------------------|-----------------|---------------------|-----------------|
| <b>Glucose-lowering drug</b> |                      |                                                  |                 |                     |                 |
| <b>Age, years</b>            |                      |                                                  |                 |                     |                 |
| 25-44                        | 37.41 (30.78, 44.56) | 0 (ref)                                          |                 | 1 (ref)             |                 |
| 45-54                        | 57.95 (54.29, 61.51) | 18.70 (11.52, 25.87)                             | <0.0001         | 1.48 (1.24, 1.75)   | <0.0001         |
| 55-69                        | 65.46 (62.23, 68.56) | 24.91 (17.90, 31.92)                             | <0.0001         | 1.63 (1.38, 1.93)   | <0.0001         |
| <b>Sex</b>                   |                      |                                                  |                 |                     |                 |
| Male                         | 58.98 (55.02, 62.83) | 0 (ref)                                          |                 | 1 (ref)             |                 |
| Female                       | 56.94 (53.90, 59.93) | -0.28 (-4.61, 4.04)                              | 0.898           | 1.00 (0.92, 1.07)   | 0.898           |
| <b>Education</b>             |                      |                                                  |                 |                     |                 |
| No schooling                 | 51.70 (44.72, 58.61) | 0 (ref)                                          |                 | 1 (ref)             |                 |
| Primary                      | 60.21 (55.79, 64.46) | 9.59 (1.73, 17.45)                               | 0.017           | 1.19 (1.02, 1.37)   | 0.023           |
| Secondary or higher          | 57.16 (53.90, 60.36) | 4.49 (-3.39, 12.37)                              | 0.264           | 1.09 (0.94, 1.26)   | 0.275           |
| <b>Statins</b>               |                      |                                                  |                 |                     |                 |
| <b>Age, years</b>            |                      |                                                  |                 |                     |                 |
| 40-54                        | 8.10 (6.51, 10.04)   | 0 (ref)                                          |                 | 1 (ref)             |                 |
| 55-70                        | 13.85 (12.02, 15.92) | 4.64 (2.33, 6.94)                                | <0.0001         | 1.54 (1.23, 1.93)   | <0.0001         |
| <b>Sex</b>                   |                      |                                                  |                 |                     |                 |
| Male                         | 11.37 (9.45, 13.62)  | 0 (ref)                                          |                 | 1 (ref)             |                 |
| Female                       | 10.96 (9.40, 12.75)  | 0.01 (-2.23, 2.25)                               | 0.992           | 1.00 (0.82, 1.22)   | 0.992           |
| <b>Education</b>             |                      |                                                  |                 |                     |                 |
| No schooling                 | 10.22 (6.73, 15.24)  | 0 (ref)                                          |                 | 1 (ref)             |                 |

|                              |                      |                      |         |                   |         |
|------------------------------|----------------------|----------------------|---------|-------------------|---------|
| Primary                      | 10.07 (8.24, 12.26)  | 0.22 (-4.98, 5.42)   | 0.934   | 1.02 (0.61, 1.73) | 0.934   |
| Secondary or higher          | 11.84 (10.01, 13.95) | 2.06 (-2.52, 6.64)   | 0.378   | 1.21 (0.77, 1.90) | 0.412   |
| <b>Antihypertensive drug</b> |                      |                      |         |                   |         |
| <b>Age, years</b>            |                      |                      |         |                   |         |
| 25-44                        | 16.11 (11.78, 21.65) | 0 (ref)              |         | 1 (ref)           |         |
| 45-54                        | 34.49 (31.46, 37.66) | 21.60 (12.42, 30.77) | <0.0001 | 1.70 (1.28, 2.27) | <0.0001 |
| 55-70                        | 52.83 (49.66, 55.98) | 32.58 (23.08, 42.08) | <0.0001 | 2.06 (1.54, 2.77) | <0.0001 |
| <b>Sex</b>                   |                      |                      |         |                   |         |
| Male                         | 33.51 (30.32, 36.86) | 0 (ref)              |         | 1 (ref)           |         |
| Female                       | 43.68 (40.92, 46.48) | 11.29 (6.40, 16.18)  | <0.0001 | 1.23 (1.12, 1.36) | <0.0001 |
| <b>Education</b>             |                      |                      |         |                   |         |
| No schooling                 | 38.24 (32.53, 44.30) | 0 (ref)              |         | 1 (ref)           |         |
| Primary                      | 37.29 (33.59, 41.14) | 6.90 (-2.83, 16.62)  | 0.164   | 1.14 (0.94, 1.37) | 0.180   |
| Secondary or higher          | 40.49 (37.54, 43.51) | 3.29 (-7.01, 13.59)  | 0.531   | 1.07 (0.87, 1.30) | 0.538   |
| <b>Aspirin</b>               |                      |                      |         |                   |         |
| <b>Age, years</b>            |                      |                      |         |                   |         |
| 25-44                        | 9.34 (3.72, 21.55)   | 0 (ref)              |         | 1 (ref)           |         |
| 45-54                        | 25.94 (20.26, 32.56) | 13.01 (3.61, 22.40)  | 0.007   | 2.04 (1.03, 4.04) | 0.041   |
| 55-70                        | 29.18 (24.42, 34.44) | 15.80 (6.80, 24.81)  | 0.001   | 2.26 (1.15, 4.45) | 0.018   |
| <b>Sex</b>                   |                      |                      |         |                   |         |
| Male                         | 23.52 (18.91, 28.85) | 0 (ref)              |         | 1 (ref)           |         |
| Female                       | 29.55 (24.21, 35.53) | 3.88 (-1.72, 9.48)   | 0.174   | 1.16 (0.93, 1.44) | 0.180   |
| <b>Education</b>             |                      |                      |         |                   |         |
| No schooling                 | 29.28 (16.05, 47.29) | 0 (ref)              |         | 1 (ref)           |         |
| Primary                      | 21.79 (16.75, 27.84) | 8.53 (-0.87, 17.93)  | 0.075   | 1.41 (0.95, 2.11) | 0.089   |
| Secondary or higher          | 31.13 (26.77, 35.87) | 7.38 (-0.76, 15.52)  | 0.075   | 1.36 (0.94, 1.97) | 0.105   |

Prevalence has been recalculated based on the adjusted weight. This gives equal weight to each country. The prevalence of statin use was assessed only in people with diabetes aged 40 years or older. The prevalence of aspirin use was assessed in people with diabetes with a history of CVD and a 10-year risk of CVD greater than 20%, as calculated using the WHO CVD Risk Laboratory-based Chart.

Metabolic targets

|                                                 | Prevalence (%)       | Estimated average<br>marginal effect (95% CI) | <i>P</i> values | Risk ratio (95% CI) | <i>P</i> values |
|-------------------------------------------------|----------------------|-----------------------------------------------|-----------------|---------------------|-----------------|
| <b>Fasting blood-glucose &lt;6.1 mmol/L</b>     |                      |                                               |                 |                     |                 |
| <b>Age, years</b>                               |                      |                                               |                 |                     |                 |
| 25-44                                           | 63.10 (56.70, 69.07) | 0 (ref)                                       |                 | 1 (ref)             |                 |
| 45-54                                           | 39.39 (36.06, 42.82) | -19.38 (-25.85, -12.91)                       | <0.0001         | 0.68 (0.60, 0.76)   | <0.0001         |
| 55-69                                           | 39.28 (36.01, 42.65) | -20.33 (-26.87, -13.79)                       | <0.0001         | 0.66 (0.58, 0.75)   | <0.0001         |
| <b>Sex</b>                                      |                      |                                               |                 |                     |                 |
| Male                                            | 43.68 (39.91, 47.52) | 0 (ref)                                       |                 | 1 (ref)             |                 |
| Female                                          | 43.65 (40.51, 46.86) | -0.24 (-4.37, 3.90)                           | 0.911           | 0.90 (1.09, 0.91)   | 0.898           |
| <b>Education</b>                                |                      |                                               |                 |                     |                 |
| No schooling                                    | 47.05 (40.71, 53.49) | 0 (ref)                                       |                 | 1 (ref)             |                 |
| Primary                                         | 42.55 (37.73, 47.51) | -5.53 (-12.57, 1.51)                          | 0.123           | 0.88 (0.75, 1.03)   | 0.115           |
| Secondary or higher                             | 43.35 (40.46, 46.29) | -1.66 (-8.48, 5.17)                           | 0.634           | 0.96 (0.83, 1.12)   | 0.631           |
| <b>Body mass index &lt; 25 kg/m<sup>2</sup></b> |                      |                                               |                 |                     |                 |
| <b>Age, years</b>                               |                      |                                               |                 |                     |                 |
| 25-44                                           | 40.69 (33.58, 48.21) | 0 (ref)                                       |                 | 1 (ref)             |                 |
| 45-54                                           | 23.68 (20.77, 26.86) | -11.78 (-18.14, -5.42)                        | <0.0001         | 0.67 (0.55, 0.82)   | <0.0001         |
| 55-70                                           | 24.76 (21.79, 27.98) | -10.38 (-16.73, -4.02)                        | 0.001           | 0.71 (0.59, 0.86)   | 0.001           |
| <b>Sex</b>                                      |                      |                                               |                 |                     |                 |
| Male                                            | 34.03 (30.16, 38.12) | 0 (ref)                                       |                 | 1 (ref)             |                 |

|                                         |                      |                         |         |                   |         |
|-----------------------------------------|----------------------|-------------------------|---------|-------------------|---------|
| Female                                  | 21.64 (19.20, 24.30) | -11.53 (-15.43, -7.63)  | <0.0001 | 0.66 (0.57, 0.75) | <0.0001 |
| <b>Education</b>                        |                      |                         |         |                   |         |
| No schooling                            | 35.15 (29.03, 41.80) | 0 (ref)                 |         | 1 (ref)           |         |
| Primary                                 | 28.09 (23.39, 33.32) | -6.29 (-13.51, 0.92)    | 0.087   | 0.81 (0.64, 1.02) | 0.074   |
| Secondary or higher                     | 24.36 (21.78, 27.14) | -7.86 (-15.13, -0.59)   | 0.034   | 0.76 (0.60, 0.96) | 0.024   |
| <b>Blood pressure &lt; 140/90 mm Hg</b> |                      |                         |         |                   |         |
| <b>Age, years</b>                       |                      |                         |         |                   |         |
| 25-44                                   | 68.35 (62.35, 73.80) | 0 (ref)                 |         | 1 (ref)           |         |
| 45-54                                   | 50.97 (47.57, 54.37) | -13.83 (-20.07, -7.59)  | <0.0001 | 0.79 (0.71, 0.87) | <0.0001 |
| 55-70                                   | 38.46 (35.51, 41.49) | -26.43 (-32.34, -20.51) | <0.0001 | 0.60 (0.53, 0.66) | <0.0001 |
| <b>Sex</b>                              |                      |                         |         |                   |         |
| Male                                    | 49.79 (46.17, 53.41) | 0 (ref)                 |         | 1 (ref)           |         |
| Female                                  | 47.84 (45.27, 50.42) | -1.38 (-5.33, 2.58)     | 0.495   | 0.97 (0.90, 1.05) | 0.493   |
| <b>Education</b>                        |                      |                         |         |                   |         |
| No schooling                            | 48.32 (41.89, 54.81) | 0 (ref)                 |         | 1 (ref)           |         |
| Primary                                 | 52.49 (48.53, 56.42) | 2.19 (-5.31, 9.69)      | 0.567   | 1.05 (0.89, 1.23) | 0.572   |
| Secondary or higher                     | 46.00 (43.10, 48.93) | 3.25 (-4.38, 10.89)     | 0.404   | 1.07 (0.91, 1.26) | 0.412   |
| <b>Total cholesterol &lt;5.0 mmol/L</b> |                      |                         |         |                   |         |
| <b>Age, years</b>                       |                      |                         |         |                   |         |
| 25-44                                   | 63.97 (57.60, 69.89) | 0 (ref)                 |         | 1 (ref)           |         |
| 45-54                                   | 61.88 (58.42, 65.21) | 0.29 (-5.36, 5.94)      | 0.919   | 1.00 (0.92, 1.10) | 0.919   |
| 55-70                                   | 54.91 (51.79, 57.99) | -6.85 (-12.64, -1.05)   | 0.021   | 0.89 (0.81, 0.98) | 0.018   |
| <b>Sex</b>                              |                      |                         |         |                   |         |
| Male                                    | 66.50 (63.11, 69.73) | 0 (ref)                 |         | 1 (ref)           |         |
| Female                                  | 53.24 (50.42, 56.04) | -11.03 (-14.72, -7.33)  | <0.0001 | 0.83 (0.78, 0.88) | <0.0001 |
| <b>Education</b>                        |                      |                         |         |                   |         |

|                     |                      |                    |       |                   |       |
|---------------------|----------------------|--------------------|-------|-------------------|-------|
| No schooling        | 63.29 (56.60, 69.50) | 0 (ref)            |       | 1 (ref)           |       |
| Primary             | 58.91 (54.58, 63.11) | 1.39 (-5.73, 8.52) | 0.701 | 1.02 (0.91, 1.16) | 0.703 |
| Secondary or higher | 58.73 (55.78, 61.61) | 1.44 (-5.95, 8.83) | 0.702 | 1.02 (0.90, 1.16) | 0.704 |

Prevalence has been recalculated based on the adjusted weight. This gives equal weight to each country. Bangladesh, Myanmar, Nepal, Sri Lanka and Timor-Leste have a body mass index target of less than 23 kg/m<sup>2</sup>. Total cholesterol targets were set at less than 5.0 mmol/L (190 mg/dL) for patients without a history of CVD and less than 4.0 mmol/L (152 mg/dL) for patients with a history of CVD.

#### Lifestyle targets

|                               | Prevalence (%)      | Estimated average<br>marginal effect (95% CI) | <i>P</i> values | Risk ratio (95% CI) | <i>P</i> values |
|-------------------------------|---------------------|-----------------------------------------------|-----------------|---------------------|-----------------|
| <b>Not currently smoking</b>  |                     |                                               |                 |                     |                 |
| <b>Age, years</b>             |                     |                                               |                 |                     |                 |
| 25-44                         | 81.4 (77.6 to 84.6) | 0 (ref)                                       |                 | 1 (ref)             |                 |
| 45-54                         | 83.6 (80.6 to 86.3) | 1.75 (-3.08, 6.57)                            | 0.478           | 1.01 (0.98, 1.04)   | 0.479           |
| 55-69                         | 81.6 (78.5 to 82.3) | 7.35 (2.59, 12.11)                            | 0.002           | 1.04 (1.01, 1.07)   | 0.003           |
| <b>Sex</b>                    |                     |                                               |                 |                     |                 |
| Male                          | 66.1 (62.9 to 69.2) | 0 (ref)                                       |                 | 1 (ref)             |                 |
| Female                        | 96.8 (95.8 to 97.5) | 21.50 (18.46, 24.54)                          | <0.0001         | 1.12 (1.11, 1.14)   | <0.0001         |
| <b>Education</b>              |                     |                                               |                 |                     |                 |
| No schooling                  | 86.0 (82.7 to 88.8) | 0 (ref)                                       |                 | 1 (ref)             |                 |
| Primary                       | 80.4 (77.6 to 82.9) | -4.17 (-9.91, 1.57)                           | 0.155           | 0.98 (0.95, 1.01)   | 0.151           |
| Secondary or higher           | 83.8 (81.2 to 86.2) | -5.88 (-12.44, 0.69)                          | 0.079           | 0.97 (0.94, 1.00)   | 0.077           |
| <b>Not currently drinking</b> |                     |                                               |                 |                     |                 |
| <b>Age, years</b>             |                     |                                               |                 |                     |                 |
| 25-44                         | 80.4 (76.1 to 84.0) | 0 (ref)                                       |                 | 1 (ref)             |                 |
| 45-54                         | 83.2 (79.8 to 86.1) | 5.44 (-0.15, 11.03)                           | 0.057           | 1.03 (1.00, 1.06)   | 0.059           |

|                                                                      |                     |                        |         |                   |         |
|----------------------------------------------------------------------|---------------------|------------------------|---------|-------------------|---------|
| 55-70                                                                | 85.6 (83.0 to 87.8) | 10.37 (4.95, 15.79)    | <0.0001 | 1.06 (1.03, 1.09) | <0.0001 |
| <b>Sex</b>                                                           |                     |                        |         |                   |         |
| Male                                                                 | 72.7 (69.2 to 75.9) | 0 (ref)                |         | 1 (ref)           |         |
| Female                                                               | 91.5 (89.9 to 92.8) | 18.57 (15.27, 21.88)   | <0.0001 | 1.11 (1.09, 1.13) | <0.0001 |
| <b>Education</b>                                                     |                     |                        |         |                   |         |
| No schooling                                                         | 87.3 (83.4 to 90.4) | 0 (ref)                |         | 1 (ref)           |         |
| Primary                                                              | 85.9 (83.3 to 88.2) | -3.28 (-8.51, 1.95)    | 0.218   | 0.98 (0.95, 1.01) | 0.217   |
| Secondary or higher                                                  | 77.0 (73.9 to 79.9) | -7.96 (-12.97, -2.96)  | 0.002   | 0.96 (0.93, 0.98) | 0.002   |
| <b>Sufficient physical activity</b>                                  |                     |                        |         |                   |         |
| <b>Age, years</b>                                                    |                     |                        |         |                   |         |
| 25-44                                                                | 76.0 (72.1 to 79.4) | 0 (ref)                |         | 1 (ref)           |         |
| 45-54                                                                | 66.8 (62.8 to 70.6) | -4.43 (-10.18, 1.32)   | 0.131   | 0.93 (0.84, 1.02) | 0.126   |
| 55-70                                                                | 43.7 (40.0 to 47.5) | -14.92 (-20.48, -9.37) | <0.0001 | 0.76 (0.69, 0.84) | <0.0001 |
| <b>Sex</b>                                                           |                     |                        |         |                   |         |
| Male                                                                 | 65.0 (61.8 to 68.1) | 0 (ref)                |         | 1 (ref)           |         |
| Female                                                               | 65.8 (62.7 to 68.8) | -5.81 (-9.77, -1.85)   | 0.004   | 0.90 (0.83, 0.97) | 0.004   |
| <b>Education</b>                                                     |                     |                        |         |                   |         |
| No schooling                                                         | 69.6 (64.9 to 74.0) | 0 (ref)                |         | 1 (ref)           |         |
| Primary                                                              | 65.3 (61.7 to 68.8) | -3.81 (-12.01, 4.38)   | 0.362   | 0.93 (0.80, 1.08) | 0.352   |
| Secondary or higher                                                  | 62.6 (59.1 to 65.9) | -0.32 (-9.02, 8.39)    | 0.943   | 0.99 (0.85, 1.16) | 0.943   |
| <b>Dietary fruit and vegetables <math>\geq 5</math> servings/day</b> |                     |                        |         |                   |         |
| <b>Age, years</b>                                                    |                     |                        |         |                   |         |
| 25-44                                                                | 14.4 (11.5 to 17.7) | 0 (ref)                |         | 1 (ref)           |         |
| 45-54                                                                | 15.8 (13.1 to 18.9) | 0.26 (-5.02, 5.54)     | 0.922   | 1.01 (0.76, 1.36) | 0.922   |
| 55-70                                                                | 20.4 (17.6 to 23.5) | 2.94 (-2.38, 8.25)     | 0.278   | 1.16 (0.88, 1.55) | 0.298   |
| <b>Sex</b>                                                           |                     |                        |         |                   |         |

|                     |                     |                     |       |                   |       |
|---------------------|---------------------|---------------------|-------|-------------------|-------|
| Male                | 17.2 (14.7 to 20.1) | 0 (ref)             |       | 1 (ref)           |       |
| Female              | 15.4 (13.4 to 17.6) | -0.99 (-4.09, 2.12) | 0.532 | 0.95 (0.81, 1.11) | 0.529 |
| <b>Education</b>    |                     |                     |       |                   |       |
| No schooling        | 5.2 (3.9 to 7.1)    | 0 (ref)             |       | 1 (ref)           |       |
| Primary             | 13.3 (11.1 to 16.0) | 2.31 (-3.30, 7.93)  | 0.419 | 1.14 (0.82, 1.60) | 0.436 |
| Secondary or higher | 25.8 (22.7 to 29.1) | 4.45 (-1.18, 10.08) | 0.122 | 1.27 (0.91, 1.78) | 0.157 |

Prevalence has been recalculated based on the adjusted weight. This gives equal weight to each country.

Supplementary Table S9: Association between individual characteristics and guideline-recommended treatment, metabolic and lifestyle targets in people with diabetes (Multivariable Poisson regression model)

Treatment targets

|                              | Prevalence (%)       | Estimated average marginal effect (95% CI) | <i>P</i> values | Risk ratio (95% CI) | <i>P</i> values |
|------------------------------|----------------------|--------------------------------------------|-----------------|---------------------|-----------------|
| <b>Glucose-lowering drug</b> |                      |                                            |                 |                     |                 |
| <b>Age, years</b>            |                      |                                            |                 |                     |                 |
| 25-44                        | 37.41 (30.78, 44.56) | 0 (ref)                                    |                 | 1 (ref)             |                 |
| 45-54                        | 57.95 (54.29, 61.51) | 18.93 (11.74, 26.11)                       | <0.0001         | 1.48 (1.25, 1.77)   | <0.0001         |
| 55-69                        | 65.46 (62.23, 68.56) | 25.03 (17.96, 32.09)                       | <0.0001         | 1.64 (1.38, 1.95)   | <0.0001         |
| <b>Sex</b>                   |                      |                                            |                 |                     |                 |
| Male                         | 58.98 (55.02, 62.83) | 0 (ref)                                    |                 | 1 (ref)             |                 |
| Female                       | 56.94 (53.90, 59.93) | -0.34 (-4.79, 4.11)                        | 0.881           | 0.99 (0.92, 1.07)   | 0.881           |
| <b>Education</b>             |                      |                                            |                 |                     |                 |
| No schooling                 | 51.70 (44.72, 58.61) | 0 (ref)                                    |                 | 1 (ref)             |                 |
| Primary                      | 60.21 (55.79, 64.46) | 12.76 (5.00, 20.53)                        | 0.001           | 1.26 (1.08, 1.47)   | 0.003           |
| Secondary or higher          | 57.16 (53.90, 60.36) | 8.69 (0.70, 16.67)                         | 0.033           | 1.18 (1.01, 1.38)   | 0.042           |



|                              |                      |                      |         |                   |  |         |
|------------------------------|----------------------|----------------------|---------|-------------------|--|---------|
| <b>Statins</b>               |                      |                      |         |                   |  |         |
| <b>Age, years</b>            |                      |                      |         |                   |  |         |
| 40-54                        | 8.10 (6.51, 10.04)   | 0 (ref)              |         | 1 (ref)           |  |         |
| 55-70                        | 13.85 (12.02, 15.92) | 4.47 (2.11, 6.82)    | <0.0001 | 1.52 (1.21, 1.93) |  | <0.0001 |
| <b>Sex</b>                   |                      |                      |         |                   |  |         |
| Male                         | 11.37 (9.45, 13.62)  | 0 (ref)              |         | 1 (ref)           |  |         |
| Female                       | 10.96 (9.40, 12.75)  | 0.74 (-1.51, 2.99)   | 0.519   | 1.07 (0.87, 1.32) |  | 0.523   |
| <b>Education</b>             |                      |                      |         |                   |  |         |
| No schooling                 | 10.22 (6.73, 15.24)  | 0 (ref)              |         | 1 (ref)           |  |         |
| Primary                      | 10.07 (8.24, 12.26)  | 0.69 (-4.02, 5.40)   | 0.774   | 1.07 (0.65, 1.76) |  | 0.778   |
| Secondary or higher          | 11.84 (10.01, 13.95) | 2.89 (-1.30, 7.09)   | 0.176   | 1.31 (0.85, 2.02) |  | 0.223   |
| <b>Antihypertensive drug</b> |                      |                      |         |                   |  |         |
| <b>Age, years</b>            |                      |                      |         |                   |  |         |
| 25-44                        | 16.11 (11.78, 21.65) | 0 (ref)              |         | 1 (ref)           |  |         |
| 45-54                        | 34.49 (31.46, 37.66) | 22.47 (13.92, 31.02) | <0.0001 | 1.77 (1.34, 2.34) |  | <0.0001 |
| 55-70                        | 52.83 (49.66, 55.98) | 35.01 (26.34, 43.67) | <0.0001 | 2.20 (1.66, 2.91) |  | <0.0001 |
| <b>Sex</b>                   |                      |                      |         |                   |  |         |
| Male                         | 33.51 (30.32, 36.86) | 0 (ref)              |         | 1 (ref)           |  |         |
| Female                       | 43.68 (40.92, 46.48) | 12.84 (8.10, 17.58)  | <0.0001 | 1.27 (1.16, 1.39) |  | <0.0001 |
| <b>Education</b>             |                      |                      |         |                   |  |         |
| No schooling                 | 38.24 (32.53, 44.30) | 0 (ref)              |         | 1 (ref)           |  |         |
| Primary                      | 37.29 (33.59, 41.14) | 14.61 (6.16, 23.07)  | 0.001   | 1.35 (1.12, 1.62) |  | 0.002   |
| Secondary or higher          | 40.49 (37.54, 43.51) | 14.84 (5.45, 24.24)  | 0.002   | 1.35 (1.10, 1.66) |  | 0.004   |
| <b>Aspirin</b>               |                      |                      |         |                   |  |         |
| <b>Age, years</b>            |                      |                      |         |                   |  |         |
| 25-44                        | 9.34 (3.72, 21.55)   | 0 (ref)              |         | 1 (ref)           |  |         |

|                     |                      |                     |         |                   |       |
|---------------------|----------------------|---------------------|---------|-------------------|-------|
| 45-54               | 25.94 (20.26, 32.56) | 13.96 (5.29, 22.62) | 0.002   | 2.18 (1.13, 4.19) | 0.020 |
| 55-70               | 29.18 (24.42, 34.44) | 17.19 (8.85, 25.52) | <0.0001 | 2.45 (1.27, 4.71) | 0.007 |
| <b>Sex</b>          |                      |                     |         |                   |       |
| Male                | 23.52 (18.91, 28.85) | 0 (ref)             |         | 1 (ref)           |       |
| Female              | 29.55 (24.21, 35.53) | 5.34 (-0.35, 11.03) | 0.066   | 1.22 (0.98, 1.52) | 0.070 |
| <b>Education</b>    |                      |                     |         |                   |       |
| No schooling        | 29.28 (16.05, 47.29) | 0 (ref)             |         | 1 (ref)           |       |
| Primary             | 21.79 (16.75, 27.84) | 10.48 (1.73, 19.24) | 0.019   | 1.57 (1.05, 2.35) | 0.028 |
| Secondary or higher | 31.13 (26.77, 35.87) | 11.15 (2.72, 19.57) | 0.010   | 1.60 (1.07, 2.40) | 0.022 |

Prevalence has been recalculated based on the adjusted weight. This gives equal weight to each country. The multivariable Poisson regression models have been adjusted for age group, sex and education, with the inclusion of country-level fixed effects.

#### Metabolic targets

|                                             | Prevalence (%)       | Estimated average marginal effect (95% CI) | <i>P</i> values | Risk ratio (95% CI) | <i>P</i> values |
|---------------------------------------------|----------------------|--------------------------------------------|-----------------|---------------------|-----------------|
| <b>Fasting blood-glucose &lt;6.1 mmol/L</b> |                      |                                            |                 |                     |                 |
| <b>Age, years</b>                           |                      |                                            |                 |                     |                 |
| 25-44                                       | 63.10 (56.70, 69.07) | 0 (ref)                                    |                 | 1 (ref)             |                 |
| 45-54                                       | 39.39 (36.06, 42.82) | -19.59 (-26.26, -12.93)                    | <0.0001         | 0.67 (0.59, 0.76)   | <0.0001         |
| 55-69                                       | 39.28 (36.01, 42.65) | -20.33 (-27.14, -13.52)                    | <0.0001         | 0.66 (0.58, 0.75)   | <0.0001         |
| <b>Sex</b>                                  |                      |                                            |                 |                     |                 |
| Male                                        | 43.68 (39.91, 47.52) | 0 (ref)                                    |                 | 1 (ref)             |                 |
| Female                                      | 43.65 (40.51, 46.86) | -0.11 (-4.30, 4.08)                        | 0.959           | 1.00 (0.91, 1.10)   | 0.959           |
| <b>Education</b>                            |                      |                                            |                 |                     |                 |
| No schooling                                | 47.05 (40.71, 53.49) | 0 (ref)                                    |                 | 1 (ref)             |                 |
| Primary                                     | 42.55 (37.73, 47.51) | -9.45 (-17.06, -1.83)                      | 0.015           | 0.81 (0.69, 0.95)   | 0.011           |

|                                                |                      |                         |         |                   |         |
|------------------------------------------------|----------------------|-------------------------|---------|-------------------|---------|
| Secondary or higher                            | 43.35 (40.46, 46.29) | -6.32 (-13.96, 1.32)    | 0.105   | 0.87 (0.75, 1.02) | 0.092   |
| <b>Body mass index &lt;25 kg/m<sup>2</sup></b> |                      |                         |         |                   |         |
| <b>Age, years</b>                              |                      |                         |         |                   |         |
| 25-44                                          | 40.69 (33.58, 48.21) | 0 (ref)                 |         | 1 (ref)           |         |
| 45-54                                          | 23.68 (20.77, 26.86) | -10.80 (-17.03, -4.57)  | 0.001   | 0.70 (0.57, 0.85) | <0.0001 |
| 55-70                                          | 24.76 (21.79, 27.98) | -10.71 (-16.88, -4.54)  | 0.001   | 0.70 (0.58, 0.85) | <0.0001 |
| <b>Sex</b>                                     |                      |                         |         |                   |         |
| Male                                           | 34.03 (30.16, 38.12) | 0 (ref)                 |         | 1 (ref)           |         |
| Female                                         | 21.64 (19.20, 24.30) | -12.05 (-16.11, -7.99)  | <0.0001 | 0.64 (0.56, 0.74) | <0.0001 |
| <b>Education</b>                               |                      |                         |         |                   |         |
| No schooling                                   | 35.15 (29.03, 41.80) | 0 (ref)                 |         | 1 (ref)           |         |
| Primary                                        | 28.09 (23.39, 33.32) | -12.30 (-20.33, -4.27)  | 0.003   | 0.69 (0.55, 0.86) | 0.001   |
| Secondary or higher                            | 24.36 (21.78, 27.14) | -14.97 (-23.37, -6.57)  | <0.0001 | 0.62 (0.49, 0.78) | <0.0001 |
| <b>Blood pressure &lt;140/90 mm Hg</b>         |                      |                         |         |                   |         |
| <b>Age, years</b>                              |                      |                         |         |                   |         |
| 25-44                                          | 68.35 (62.35, 73.80) | 0 (ref)                 |         | 1 (ref)           |         |
| 45-54                                          | 50.97 (47.57, 54.37) | -13.93 (-20.33, -7.54)  | <0.0001 | 0.79 (0.71, 0.88) | <0.0001 |
| 55-70                                          | 38.46 (35.51, 41.49) | -26.75 (-32.95, -20.54) | <0.0001 | 0.59 (0.53, 0.66) | <0.0001 |
| <b>Sex</b>                                     |                      |                         |         |                   |         |
| Male                                           | 49.79 (46.17, 53.41) | 0 (ref)                 |         | 1 (ref)           |         |
| Female                                         | 47.84 (45.27, 50.42) | -1.45 (-5.55, 2.64)     | 0.486   | 0.97 (0.89, 1.06) | 0.485   |
| <b>Education</b>                               |                      |                         |         |                   |         |
| No schooling                                   | 48.32 (41.89, 54.81) | 0 (ref)                 |         | 1 (ref)           |         |
| Primary                                        | 52.49 (48.53, 56.42) | -1.67 (-9.72, 6.38)     | 0.684   | 0.97 (0.82, 1.14) | 0.681   |
| Secondary or higher                            | 46.00 (43.10, 48.93) | -2.30 (-10.68, 6.09)    | 0.592   | 0.95 (0.81, 1.13) | 0.587   |
| <b>Total cholesterol &lt;5.0 mmol/L</b>        |                      |                         |         |                   |         |

| <b>Age, years</b>   |                      |                        |         |  |                   |         |
|---------------------|----------------------|------------------------|---------|--|-------------------|---------|
| 25-44               | 63.97 (57.60, 69.89) | 0 (ref)                |         |  | 1 (ref)           |         |
| 45-54               | 61.88 (58.42, 65.21) | 0.29 (-5.32, 5.90)     | 0.919   |  | 1.00 (0.92, 1.10) | 0.920   |
| 55-70               | 54.91 (51.79, 57.99) | -7.62 (-13.36, -1.89)  | 0.009   |  | 0.88 (0.80, 0.97) | 0.007   |
| <b>Sex</b>          |                      |                        |         |  |                   |         |
| Male                | 66.50 (63.11, 69.73) | 0 (ref)                |         |  | 1 (ref)           |         |
| Female              | 53.24 (50.42, 56.04) | -11.93 (-15.77, -8.09) | <0.0001 |  | 0.82 (0.77, 0.87) | <0.0001 |
| <b>Education</b>    |                      |                        |         |  |                   |         |
| No schooling        | 63.29 (56.60, 69.50) | 0 (ref)                |         |  | 1 (ref)           |         |
| Primary             | 58.91 (54.58, 63.11) | -1.60 (-8.72, 5.52)    | 0.660   |  | 0.97 (0.87, 1.09) | 0.657   |
| Secondary or higher | 58.73 (55.78, 61.61) | -3.52 (-11.12, 4.08)   | 0.364   |  | 0.94 (0.83, 1.07) | 0.356   |

Prevalence has been recalculated based on the adjusted weight. This gives equal weight to each country. The multivariable Poisson regression models have been adjusted for age group, sex and education, with the inclusion of country-level fixed effects.

#### Lifestyle targets

|                              | Prevalence (%)      | Estimated average<br>marginal effect (95% CI) | <i>P</i> values | Risk ratio (95% CI) | <i>P</i> values |
|------------------------------|---------------------|-----------------------------------------------|-----------------|---------------------|-----------------|
| <b>Not currently smoking</b> |                     |                                               |                 |                     |                 |
| <b>Age, years</b>            |                     |                                               |                 |                     |                 |
| 25-44                        | 81.4 (77.6 to 84.6) | 0 (ref)                                       |                 | 1 (ref)             |                 |
| 45-54                        | 83.6 (80.6 to 86.3) | 0.21 (-4.44, 4.87)                            | 0.928           | 1.00 (0.98, 1.03)   | 0.928           |
| 55-69                        | 81.6 (78.5 to 82.3) | 6.86 (2.16, 11.56)                            | 0.004           | 1.04 (1.01, 1.07)   | 0.005           |
| <b>Sex</b>                   |                     |                                               |                 |                     |                 |
| Male                         | 66.1 (62.9 to 69.2) | 0 (ref)                                       |                 | 1 (ref)             |                 |
| Female                       | 96.8 (95.8 to 97.5) | 22.00 (18.75, 25.25)                          | <0.0001         | 1.13 (1.11, 1.15)   | <0.0001         |
| <b>Education</b>             |                     |                                               |                 |                     |                 |

|                                     |                     |                        |         |                   |         |
|-------------------------------------|---------------------|------------------------|---------|-------------------|---------|
| No schooling                        | 86.0 (82.7 to 88.8) | 0 (ref)                |         | 1 (ref)           |         |
| Primary                             | 80.4 (77.6 to 82.9) | 0.92 (-4.36, 6.19)     | 0.734   | 1.01 (0.98, 1.03) | 0.734   |
| Secondary or higher                 | 83.8 (81.2 to 86.2) | 2.25 (-4.08, 8.58)     | 0.487   | 1.01 (0.98, 1.05) | 0.488   |
| <b>Not currently drinking</b>       |                     |                        |         |                   |         |
| <b>Age, years</b>                   |                     |                        |         |                   |         |
| 25-44                               | 80.4 (76.1 to 84.0) | 0 (ref)                |         | 1 (ref)           |         |
| 45-54                               | 83.2 (79.8 to 86.1) | 3.45 (-2.06, 8.96)     | 0.219   | 1.02 (0.99, 1.05) | 0.222   |
| 55-70                               | 85.6 (83.0 to 87.8) | 9.05 (3.47, 14.62)     | 0.001   | 1.05 (1.02, 1.09) | 0.002   |
| <b>Sex</b>                          |                     |                        |         |                   |         |
| Male                                | 72.7 (69.2 to 75.9) | 0 (ref)                |         | 1 (ref)           |         |
| Female                              | 91.5 (89.9 to 92.8) | 18.16 (14.79, 21.53)   | <0.0001 | 1.11 (1.09, 1.13) | <0.0001 |
| <b>Education</b>                    |                     |                        |         |                   |         |
| No schooling                        | 87.3 (83.4 to 90.4) | 0 (ref)                |         | 1 (ref)           |         |
| Primary                             | 85.9 (83.3 to 88.2) | 1.34 (-3.94, 6.63)     | 0.619   | 1.01 (0.98, 1.04) | 0.619   |
| Secondary or higher                 | 77.0 (73.9 to 79.9) | -0.64 (-5.89, 4.61)    | 0.810   | 1.00 (0.97, 1.03) | 0.810   |
| <b>Sufficient physical activity</b> |                     |                        |         |                   |         |
| <b>Age, years</b>                   |                     |                        |         |                   |         |
| 25-44                               | 76.0 (72.1 to 79.4) | 0 (ref)                |         | 1 (ref)           |         |
| 45-54                               | 66.8 (62.8 to 70.6) | -4.62 (-10.48, 1.23)   | 0.122   | 0.93 (0.84, 1.02) | 0.117   |
| 55-70                               | 43.7 (40.0 to 47.5) | -15.30 (-20.97, -9.62) | <0.0001 | 0.75 (0.68, 0.83) | <0.0001 |
| <b>Sex</b>                          |                     |                        |         |                   |         |
| Male                                | 65.0 (61.8 to 68.1) | 0 (ref)                |         | 1 (ref)           |         |
| Female                              | 65.8 (62.7 to 68.8) | -5.94 (-10.11, -1.77)  | 0.005   | 0.90 (0.83, 0.97) | 0.005   |
| <b>Education</b>                    |                     |                        |         |                   |         |
| No schooling                        | 69.6 (64.9 to 74.0) | 0 (ref)                |         | 1 (ref)           |         |
| Primary                             | 65.3 (61.7 to 68.8) | -7.08 (-15.61, 1.44)   | 0.103   | 0.88 (0.76, 1.02) | 0.091   |

|                                                                     |                     |                      |       |                   |       |
|---------------------------------------------------------------------|---------------------|----------------------|-------|-------------------|-------|
| Secondary or higher                                                 | 62.6 (59.1 to 65.9) | -4.92 (-14.02, 4.18) | 0.289 | 0.92 (0.78, 1.07) | 0.278 |
| <b>Dietary fruit and vegetables <math>\geq</math>5 servings/day</b> |                     |                      |       |                   |       |
| <b>Age, years</b>                                                   |                     |                      |       |                   |       |
| 25-44                                                               | 14.4 (11.5 to 17.7) | 0 (ref)              |       | 1 (ref)           |       |
| 45-54                                                               | 15.8 (13.1 to 18.9) | 0.29 (-5.02, 5.60)   | 0.915 | 1.02 (0.76, 1.36) | 0.915 |
| 55-70                                                               | 20.4 (17.6 to 23.5) | 2.81 (-2.58, 8.21)   | 0.306 | 1.16 (0.87, 1.54) | 0.325 |
| <b>Sex</b>                                                          |                     |                      |       |                   |       |
| Male                                                                | 17.2 (14.7 to 20.1) | 0 (ref)              |       | 1 (ref)           |       |
| Female                                                              | 15.4 (13.4 to 17.6) | -0.92 (-4.18, 2.34)  | 0.581 | 0.95 (0.81, 1.13) | 0.579 |
| <b>Education</b>                                                    |                     |                      |       |                   |       |
| No schooling                                                        | 5.2 (3.9 to 7.1)    | 0 (ref)              |       | 1 (ref)           |       |
| Primary                                                             | 13.3 (11.1 to 16.0) | 2.56 (-2.95, 8.07)   | 0.363 | 1.16 (0.83, 1.62) | 0.384 |
| Secondary or higher                                                 | 25.8 (22.7 to 29.1) | 4.59 (-1.09, 10.27)  | 0.113 | 1.29 (0.91, 1.81) | 0.148 |

Prevalence has been recalculated based on the adjusted weight. This gives equal weight to each country. The multivariable Poisson regression models have been adjusted for age group, sex and education, with the inclusion of country-level fixed effects.

### Appendix 6: Sensitivity analysis

Supplementary Table S10: Prevalence of treatment, metabolic and lifestyle targets for CVD prevention in patients with diabetes, by income group

|                             | Prevalence (95% CI)  |                               |                               |                      |
|-----------------------------|----------------------|-------------------------------|-------------------------------|----------------------|
|                             | Overall              | Upper-Middle Income Countries | Lower-Middle Income Countries | Low-Income Countries |
| <b>A. Treatment targets</b> |                      |                               |                               |                      |
| Glucose-lowering            |                      |                               |                               |                      |
| drug                        | 64.52 (61.59, 67.35) | 71.85 (68.88, 74.64)          | 63.39 (59.74, 66.89)          | 59.49 (49.84, 68.47) |
| Statins                     | 10.96 (9.17, 13.05)  | 17.73 (15.30, 20.44)          | 9.44 (7.16, 12.35)            | 7.88 (3.78, 15.72)   |
| Antihypertensive drug       | 51.70 (47.93, 55.45) | 61.59 (58.11, 64.95)          | 52.41 (47.76, 57.02)          | 40.02 (29.96, 50.99) |

|                             |                      |                      |                      |                      |
|-----------------------------|----------------------|----------------------|----------------------|----------------------|
| Aspirin                     | 23.24 (19.12, 27.94) | 35.63 (30.99, 40.55) | 20.07 (15.13, 26.12) | 20.17 (10.38, 35.51) |
| <b>B. Metabolic targets</b> |                      |                      |                      |                      |
| Fasting blood glucose       |                      |                      |                      |                      |
| <6.1 mmol/L                 | 39.69 (36.74, 42.71) | 36.99 (33.84, 40.26) | 37.87 (34.19, 41.69) | 47.48 (38.45, 56.68) |
| Body mass index <25         |                      |                      |                      |                      |
| kg/m <sup>2</sup>           | 31.28 (28.55, 34.15) | 17.00 (14.75, 19.51) | 30.32 (27.21, 33.64) | 47.95 (39.15, 56.89) |
| Blood pressure              |                      |                      |                      |                      |
| <140/90 mm Hg               | 50.90 (48.14, 53.65) | 50.67 (47.65, 53.68) | 51.50 (48.12, 54.86) | 49.44 (40.75, 58.16) |
| Total cholesterol <5.0      |                      |                      |                      |                      |
| mmol/L                      | 63.87 (60.93, 66.72) | 56.29 (52.91, 59.61) | 63.06 (59.04, 66.92) | 73.58 (65.97, 80.00) |
| <b>C. Lifestyle targets</b> |                      |                      |                      |                      |
| Not currently smoking       | 87.20 (85.10, 89.03) | 83.46 (80.73, 85.87) | 85.57 (82.38, 88.26) | 95.45 (91.16, 97.72) |
| Not currently drinking      | 88.65 (86.47, 90.52) | 89.88 (88.08, 91.43) | 91.39 (89.33, 93.09) | 79.68 (70.77, 86.40) |
| Sufficient physical         |                      |                      |                      |                      |
| activity                    | 54.66 (51.82, 57.47) | 36.46 (33.40, 39.65) | 57.42 (53.73, 61.03) | 64.59 (56.93, 71.57) |
| Dietary fruit and           |                      |                      |                      |                      |
| vegetables ≥5               |                      |                      |                      |                      |
| servings/day                | 16.92 (14.67, 19.44) | 20.31 (17.51, 23.43) | 17.36 (14.48, 20.67) | 12.37 (7.02, 20.88)  |

Prevalence was recalculated based on weights provided by individual surveys and the proportion of each country's population aged 25-69. The prevalence of statin use was assessed only in people with diabetes aged 40 years or older. The prevalence of aspirin use was assessed in people with diabetes with a history of CVD and a 10-year risk of CVD greater than 20%, as calculated using the WHO CVD Risk Laboratory-based Chart. Bangladesh, Myanmar, Nepal, Sri Lanka and Timor-Leste have a body mass index target of less than 23 kg/m<sup>2</sup>. Total cholesterol targets were set at less than 5.0 mmol/L (190 mg/dL) for patients without a history of CVD and less than 4.0 mmol/L (152 mg/dL) for patients with a history of CVD.

Supplementary Table S11: Prevalence of treatment, metabolic and lifestyle targets for CVD prevention in patients with diabetes, by region  
Treatment targets

| Region                | Prevalence (95% CI)   |                      |                       |                      |                     |
|-----------------------|-----------------------|----------------------|-----------------------|----------------------|---------------------|
|                       | Glucose-lowering drug | Statins              | Antihypertensive drug | Aspirin              | All 4 targets met   |
| Africa                | 58.50 (51.16, 65.47)  | 9.17 (6.05, 13.67)   | 35.93 (28.75, 43.79)  | 16.59 (9.80, 26.70)  | 9.40 (6.22, 13.97)  |
| Americas              | 51.50 (44.32, 58.62)  | 9.67 (5.81, 15.65)   | 57.87 (48.76, 66.48)  | 16.38 (7.38, 32.48)  | 6.48 (3.66, 11.22)  |
| Western Pacific       | 27.36 (22.19, 33.23)  | 8.92 (5.79, 13.49)   | 60.82 (52.78, 68.31)  | 30.31 (22.71, 39.17) | 5.20 (3.23, 8.28)   |
| European              | 59.50 (55.67, 63.22)  | 11.11 (8.68, 14.12)  | 61.95 (57.65, 66.06)  | 35.40 (31.05, 40.01) | 7.36 (5.56, 9.69)   |
| Eastern Mediterranean | 59.13 (55.34, 62.80)  | 12.38 (10.17, 14.98) | 58.99 (54.67, 63.19)  | 28.67 (23.04, 35.04) | 11.72 (9.24, 14.77) |
| South-East Asia       | 78.33 (73.21, 82.71)  | 11.55 (8.04, 16.31)  | 57.41 (50.76, 63.81)  | 22.87 (15.67, 32.12) | 9.19 (6.61, 12.64)  |

Prevalence was recalculated based on weights provided by individual surveys and the proportion of each country's population aged 25-69.

#### Metabolic targets

| Region                | Prevalence (95% CI)                   |                              |                               |                                   |                      |
|-----------------------|---------------------------------------|------------------------------|-------------------------------|-----------------------------------|----------------------|
|                       | Body mass index <25 kg/m <sup>2</sup> | Blood pressure <140/90 mm Hg | Total cholesterol <5.0 mmol/L | Fasting blood-glucose <6.1 mmol/L | All 4 targets met    |
| Africa                | 46.94 (39.79, 54.22)                  | 43.16 (36.53, 50.04)         | 50.48 (43.73, 57.21)          | 76.81 (71.27, 81.57)              | 15.31 (10.71, 21.43) |
| Americas              | 51.42 (44.19, 58.59)                  | 23.08 (17.53, 29.74)         | 77.79 (71.64, 82.92)          | 56.68 (49.59, 63.51)              | 7.12 (4.11, 12.07)   |
| Western Pacific       | 44.22 (38.38, 50.23)                  | 22.92 (18.50, 28.04)         | 64.60 (58.73, 70.07)          | 52.37 (46.14, 58.54)              | 8.50 (5.65, 12.59)   |
| European              | 38.37 (34.84, 42.02)                  | 13.56 (11.17, 16.37)         | 31.44 (28.13, 34.94)          | 48.50 (44.63, 52.39)              | 2.21 (1.43, 3.39)    |
| Eastern Mediterranean | 34.73 (31.32, 38.32)                  | 21.65 (18.84, 24.75)         | 45.67 (41.80, 49.58)          | 63.48 (59.65, 67.15)              | 4.38 (3.02, 6.32)    |
| South-East Asia       | 35.94 (31.02, 41.18)                  | 32.17 (27.81, 36.87)         | 57.26 (52.76, 61.65)          | 58.10 (52.39, 63.61)              | 7.53 (5.08, 11.03)   |

Prevalence was recalculated based on weights provided by individual surveys and the proportion of each country's population aged 25-69.

#### Lifestyle targets

| Region | Prevalence (95% CI)   |                        |                     |                      |                   |
|--------|-----------------------|------------------------|---------------------|----------------------|-------------------|
|        | Not currently smoking | Not currently drinking | Sufficient physical | Fruit and vegetables | All 4 targets met |



|                       |                      |                      | activity             | ≥5 servings/day      |                      |
|-----------------------|----------------------|----------------------|----------------------|----------------------|----------------------|
| Africa                | 93.56 (89.74, 96.02) | 82.28 (75.49, 87.51) | 63.44 (57.19, 69.27) | 14.57 (10.07, 20.62) | 9.16 (5.31, 15.36)   |
| Americas              | 85.02 (78.60, 89.76) | 63.89 (56.93, 70.32) | 59.24 (52.67, 65.49) | 6.25 (3.41, 11.16)   | 0.27 (0.06, 1.19)    |
| Western Pacific       | 70.63 (64.39, 76.19) | 62.06 (55.86, 67.90) | 58.80 (52.72, 64.63) | 13.58 (10.02, 18.16) | 5.74 (3.50, 9.26)    |
| European              | 85.50 (82.49, 88.06) | 71.39 (67.87, 74.67) | 46.51 (42.60, 50.46) | 35.59 (31.95, 39.41) | 13.08 (10.64, 15.97) |
| Eastern Mediterranean | 86.48 (83.78, 88.78) | 99.63 (99.25, 99.82) | 38.00 (34.55, 41.58) | 14.10 (12.07, 16.41) | 4.03 (3.04, 5.33)    |
| South-East Asia       | 83.20 (78.43, 87.09) | 94.41 (91.95, 96.15) | 58.46 (53.24, 63.50) | 16.30 (12.23, 21.40) | 6.92 (4.95, 9.60)    |

Prevalence was recalculated based on weights provided by individual surveys and the proportion of each country's population aged 25-69.

Supplementary Table S12: Prevalence of guideline-recommended targets for all components of treatment, metabolic and lifestyle in people with diabetes by World Bank income group and region

By World Bank income group

|                           | Prevalence (95% CI) |                               |                               |                      |
|---------------------------|---------------------|-------------------------------|-------------------------------|----------------------|
|                           | Overall             | Upper-Middle Income Countries | Lower-Middle Income Countries | Low-Income Countries |
| Treatment targets all met | 9.51 (7.94, 11.35)  | 13.97 (11.96, 16.24)          | 7.44 (5.73, 9.61)             | 11.03 (6.51, 18.07)  |
| Metabolic targets all met | 8.73 (6.93, 10.93)  | 3.10 (2.11, 4.52)             | 7.66 (5.78, 10.08)            | 17.26 (11.22, 25.63) |
| Lifestyle targets all met | 7.43 (5.86, 9.39)   | 6.22 (4.76, 8.08)             | 7.47 (5.86, 9.48)             | 8.51 (3.88, 17.62)   |

Prevalence was recalculated based on weights provided by individual surveys and the proportion of each country's population aged 25-69.

By region

|                           | Prevalence (95% CI) |                    |                   |                   |                       |                    |
|---------------------------|---------------------|--------------------|-------------------|-------------------|-----------------------|--------------------|
|                           | Africa              | Americas           | Western Pacific   | Europe            | Eastern Mediterranean | South-East Asia    |
| Treatment targets all met | 9.40 (6.22, 13.97)  | 6.48 (3.66, 11.22) | 5.20 (3.23, 8.28) | 7.36 (5.56, 9.69) | 11.72 (9.24, 14.77)   | 9.19 (6.61, 12.64) |

|                           |                      |                    |                    |                      |                   |                    |
|---------------------------|----------------------|--------------------|--------------------|----------------------|-------------------|--------------------|
| Metabolic targets all met | 15.31 (10.71, 21.43) | 7.12 (4.11, 12.07) | 8.50 (5.65, 12.59) | 2.21 (1.43, 3.39)    | 4.38 (3.02, 6.32) | 7.53 (5.08, 11.03) |
| Lifestyle targets all met | 9.16 (5.31, 15.36)   | 0.27 (0.06, 1.19)  | 5.74 (3.50, 9.26)  | 13.08 (10.64, 15.97) | 4.03 (3.04, 5.33) | 6.92 (4.95, 9.60)  |

Prevalence was recalculated based on weights provided by individual surveys and the proportion of each country's population aged 25-69.

Supplementary Table S13: Individual characteristics of the diabetes, high risk of CVD and established CVD group

| Characteristics                | Diabetes (N=6789) |           | 10 years CVD risk >30% (N=608) |           | 10 years CVD risk >30% (N=485) |           |
|--------------------------------|-------------------|-----------|--------------------------------|-----------|--------------------------------|-----------|
|                                | Unweight          | Weighted, | Unweight                       | Weighted, | Unweight                       | Weighted, |
|                                | ed, n             | %         | ed, n                          | %         | ed, n                          | %         |
| <b>Age</b>                     |                   |           |                                |           |                                |           |
| 25-39 years                    | 878               | 18.2      | 1                              | 0.4       | 2                              | 0.5       |
| 40-54 years                    | 2610              | 38.5      | 48                             | 2.4       | 59                             | 3.6       |
| 55-69 years                    | 3301              | 43.3      | 559                            | 14.7      | 424                            | 12.9      |
| <b>Sex</b>                     |                   |           |                                |           |                                |           |
| Male                           | 2479              | 45.2      | 309                            | 10.9      | 173                            | 7.1       |
| Female                         | 4310              | 54.8      | 299                            | 4.4       | 312                            | 7.0       |
| <b>Country economic status</b> |                   |           |                                |           |                                |           |
| Upper-middle                   | 2260              | 28.9      | 31                             | 3.8       | 37                             | 6.4       |
| Lower-middle                   | 3992              | 55.3      | 304                            | 6.6       | 267                            | 7.2       |
| Low                            | 537               | 15.8      | 273                            | 10.7      | 181                            | 7.2       |
| <b>Region</b>                  |                   |           |                                |           |                                |           |
| Africa                         | 889               | 28.9      | 26                             | 2.0       | 43                             | 5.8       |
| Americas                       | 367               | 5.3       | 0                              | 0         | 2                              | 3.6       |
| Western Pacific                | 713               | 15.8      | 46                             | 2.6       | 35                             | 5.8       |

|                          |      |      |     |      |     |      |
|--------------------------|------|------|-----|------|-----|------|
| European                 | 1398 | 21.1 | 365 | 2.3  | 192 | 11.9 |
| Eastern Mediterranean    | 1853 | 15.8 | 168 | 8.6  | 152 | 6.8  |
| South-East Asia          | 1569 | 13.2 | 3   | 0.3  | 61  | 5.5  |
| <b>Education</b>         |      |      |     |      |     |      |
| No schooling             | 951  | 11.9 | 56  | 3.8  | 76  | 9.4  |
| Primary                  | 2493 | 38.1 | 638 | 3.8  | 144 | 5.9  |
| Secondary or higher      | 3128 | 50.0 | 844 | 10.7 | 240 | 7.3  |
| <b>Area of residence</b> |      |      |     |      |     |      |
| Urban                    | 2599 | 56.2 | 251 | 7.9  | 182 | 6.7  |
| Rural                    | 1607 | 43.8 | 162 | 7.3  | 133 | 7.1  |

CVD=cardiovascular. Prevalence was recalculated based on the adjusted weight, giving equal weight to each country.

Supplementary Table S14: Prevalence of aspirin use in WHO ISH risk > 30% subgroup, by income group and region

|                           | Prevalence (95% CI)  |                               |                               |                      |
|---------------------------|----------------------|-------------------------------|-------------------------------|----------------------|
|                           | Overall              | Upper-Middle Income Countries | Lower-Middle Income Countries | Low-Income Countries |
| Aspirin                   | 35.62 (31.65, 39.80) | 53.29 (46.21, 60.24)          | 23.60 (19.81, 27.85)          | 41.84 (28.06, 57.03) |
| Treatment targets all met | 6.27 (5.38, 7.30)    | 12.54 (10.20, 15.31)          | 3.66 (2.98, 4.50)             | 3.91 (1.83, 8.16)    |

Prevalence was recalculated based on the adjusted weight, giving equal weight to each country.

By region

| Prevalence (95% CI) |          |                 |        |                       |                 |
|---------------------|----------|-----------------|--------|-----------------------|-----------------|
| Africa              | Americas | Western Pacific | Europe | Eastern Mediterranean | South-East Asia |
|                     |          |                 |        |                       |                 |

|                           |                      |                      |                      |                      |                      |                      |
|---------------------------|----------------------|----------------------|----------------------|----------------------|----------------------|----------------------|
| Aspirin                   | 26.17 (16.41, 39.03) | 23.88 (11.54, 43.00) | 18.94 (13.52, 25.89) | 44.19 (38.12, 50.43) | 60.89 (52.51, 68.68) | 18.82 (13.49, 25.63) |
| Treatment targets all met | 4.32 (2.89, 6.43)    | 4.94 (2.65, 9.02)    | 3.35 (1.98, 5.62)    | 6.07 (4.12, 8.87)    | 14.56 (11.68, 18.02) | 4.96 (3.76, 6.52)    |

Prevalence was recalculated based on the adjusted weight, giving equal weight to each country.

Supplementary Table S15: Prevalence of blood pressure < 130/80 mm Hg, by income group and region

|                              | Prevalence (95% CI)  |                               |                               |                      |
|------------------------------|----------------------|-------------------------------|-------------------------------|----------------------|
|                              | Overall              | Upper-Middle Income Countries | Lower-Middle Income Countries | Low-Income Countries |
| Blood pressure <130/80 mm Hg | 24.07 (22.06, 26.21) | 24.09 (21.34, 27.06)          | 23.82 (21.45, 26.37)          | 24.95 (17.41, 34.39) |
| All metabolic target met     | 5.70 (4.25, 7.60)    | 2.13 (1.39, 3.23)             | 6.27 (4.65, 8.41)             | 10.23 (4.68, 20.92)  |

Prevalence was recalculated based on the adjusted weight, giving equal weight to each country.

#### By region

|                              | Prevalence (95% CI)  |                      |                      |                     |                       |                      |
|------------------------------|----------------------|----------------------|----------------------|---------------------|-----------------------|----------------------|
|                              | Africa               | Americas             | Western Pacific      | Europe              | Eastern Mediterranean | South-East Asia      |
| Blood pressure <130/80 mm Hg | 26.40 (21.46, 32.01) | 44.03 (36.90, 51.43) | 31.14 (26.83, 35.80) | 11.59 (9.40, 14.21) | 20.01 (16.94, 23.47)  | 27.36 (21.71, 33.85) |
| All metabolic target met     | 8.07 (4.55, 13.92)   | 5.33 (3.05, 9.14)    | 5.22 (3.09, 8.71)    | 1.35 (0.68, 2.65)   | 2.45 (1.60, 3.72)     | 12.06 (7.15, 19.63)  |

Prevalence was recalculated based on the adjusted weight, giving equal weight to each country.

#### Appendix 7: STROBE Checklist

Checklist of items that should be included in reports of cross-sectional studies

|                              | <b>Item<br/>No</b> | <b>Recommendation</b>                                                                                                                                                                | <b>Item<br/>No</b> |
|------------------------------|--------------------|--------------------------------------------------------------------------------------------------------------------------------------------------------------------------------------|--------------------|
| <b>Title and abstract</b>    | 1                  | (a) Indicate the study's design with a commonly used term in the title or the abstract                                                                                               | 1                  |
|                              |                    | (b) Provide in the abstract an informative and balanced summary of what was done and what was found                                                                                  | 2, 3               |
| <b>Introduction</b>          |                    |                                                                                                                                                                                      |                    |
| Background/rationale         | 2                  | Explain the scientific background and rationale for the investigation being reported                                                                                                 | 3, 4               |
| Objectives                   | 3                  | State specific objectives, including any prespecified hypotheses                                                                                                                     | 3, 4               |
| <b>Methods</b>               |                    |                                                                                                                                                                                      |                    |
| Study design                 | 4                  | Present key elements of study design early in the paper                                                                                                                              | 5                  |
| Setting                      | 5                  | Describe the setting, locations, and relevant dates, including periods of recruitment, exposure, follow-up, and data collection                                                      | 5                  |
| Participants                 | 6                  | (a) Give the eligibility criteria, and the sources and methods of selection of participants                                                                                          | 5                  |
| Variables                    | 7                  | Clearly define all outcomes, exposures, predictors, potential confounders, and effect modifiers. Give diagnostic criteria, if applicable                                             | 5, 6               |
| Data sources/<br>measurement | 8*                 | For each variable of interest, give sources of data and details of methods of assessment (measurement). Describe comparability of assessment methods if there is more than one group | 5                  |
| Bias                         | 9                  | Describe any efforts to address potential sources of bias                                                                                                                            | 5                  |
| Study size                   | 10                 | Explain how the study size was arrived at                                                                                                                                            | 8                  |
| Quantitative variables       | 11                 | Explain how quantitative variables were handled in the analyses. If applicable, describe which groupings were chosen and why                                                         | 5, 6               |
| Statistical methods          | 12                 | (a) Describe all statistical methods, including those used to control for confounding                                                                                                | 6, 7               |
|                              |                    | (b) Describe any methods used to examine subgroups and interactions                                                                                                                  | 7                  |
|                              |                    | (c) Explain how missing data were addressed                                                                                                                                          | 7                  |

|                   |     |                                                                                                                                                                                                              |                |
|-------------------|-----|--------------------------------------------------------------------------------------------------------------------------------------------------------------------------------------------------------------|----------------|
|                   |     | (d) If applicable, describe analytical methods taking account of sampling strategy                                                                                                                           | 7              |
|                   |     | (e) Describe any sensitivity analyses                                                                                                                                                                        | 7              |
| <b>Results</b>    |     |                                                                                                                                                                                                              |                |
| Participants      | 13* | (a) Report numbers of individuals at each stage of study—eg numbers potentially eligible, examined for eligibility, confirmed eligible, included in the study, completing follow-up, and analysed            | 8              |
|                   |     | (b) Give reasons for non-participation at each stage                                                                                                                                                         | 8              |
|                   |     | (c) Consider use of a flow diagram                                                                                                                                                                           | 8              |
| Descriptive data  | 14* | (a) Give characteristics of study participants (eg demographic, clinical, social) and information on exposures and potential confounders                                                                     | 8, 9           |
|                   |     | (b) Indicate number of participants with missing data for each variable of interest                                                                                                                          | 8              |
| Outcome data      | 15* | Report numbers of outcome events or summary measures                                                                                                                                                         | 8, 9           |
| Main results      | 16  | (a) Give unadjusted estimates and, if applicable, confounder-adjusted estimates and their precision (eg, 95% confidence interval). Make clear which confounders were adjusted for and why they were included | 8, 9, 10       |
|                   |     | (b) Report category boundaries when continuous variables were categorized                                                                                                                                    | 8, 9, 10       |
|                   |     | (c) If relevant, consider translating estimates of relative risk into absolute risk for a meaningful time period                                                                                             | 8, 9, 10       |
| Other analyses    | 17  | Report other analyses done—eg analyses of subgroups and interactions, and sensitivity analyses                                                                                                               | 10             |
| <b>Discussion</b> |     |                                                                                                                                                                                                              |                |
| Key results       | 18  | Summarise key results with reference to study objectives                                                                                                                                                     | 10, 11         |
| Limitations       | 19  | Discuss limitations of the study, taking into account sources of potential bias or imprecision. Discuss both direction and magnitude of any potential bias                                                   | 14             |
| Interpretation    | 20  | Give a cautious overall interpretation of results considering objectives, limitations, multiplicity of analyses, results from similar studies, and other relevant evidence                                   | 11, 12, 13, 14 |
| Generalisability  | 21  | Discuss the generalisability (external validity) of the study results                                                                                                                                        | 14             |

---

**Other information**

---

|         |    |                                                                                                                                                               |    |
|---------|----|---------------------------------------------------------------------------------------------------------------------------------------------------------------|----|
| Funding | 22 | Give the source of funding and the role of the funders for the present study and, if applicable, for the original study on which the present article is based | 15 |
|---------|----|---------------------------------------------------------------------------------------------------------------------------------------------------------------|----|

---

\*Give information separately for exposed and unexposed groups.
